## High variation expected in the pace and burden of SARS-CoV-2 outbreaks across sub-Saharan Africa

Benjamin L. Rice<sup>1,2</sup>, Akshaya Annapragada<sup>3</sup>, Rachel E. Baker<sup>1,4</sup>, Marjolein Bruijning<sup>1</sup>, Winfred Dotse-Gborgbortsi<sup>5</sup>, Keitly Mensah<sup>6</sup>, Ian F. Miller<sup>1</sup>, Nkengafac Villyen Motaze<sup>7,8</sup>, Antso Raheinandrasana<sup>9,10</sup>, Malavika Rajeev<sup>1</sup>, Julio Rakotonirina<sup>9,10</sup>, Tanjona Ramiadantsoa<sup>11,12,13</sup>, Fidisoa Rasambainarivo<sup>1,14</sup>, Weiyu Yu<sup>15</sup>, Bryan T. Grenfell<sup>1,16</sup>, Andrew J. Tatem<sup>4</sup>, C. Jessica E. Metcalf<sup>1,16</sup>

### Affiliations:

1. Department of Ecology and Evolutionary Biology, Princeton University, Princeton, NJ, USA
2. Madagascar Health and Environmental Research (MAHERY), Maroantsetra, Madagascar
3. Johns Hopkins University School of Medicine, Baltimore, MD, USA
4. Princeton Environmental Institute, Princeton University, Princeton, NJ, USA.
5. WorldPop, School of Geography and Environmental Science, University of Southampton, Southampton, UK
6. Centre population et Développement CEPED (Université de Paris), Institut Recherche et Développement, Paris, France
7. Centre for Vaccines and Immunology (CVI), National Institute for Communicable Diseases (NICD) a division of the National Health Laboratory Service (NHLS), South Africa
8. Department of Global Health, Faculty of Medicine and Health Sciences, Stellenbosch University, Cape Town, South Africa
9. Faculty of Medicine, University of Antananarivo, Madagascar
10. Institute of Public Health Analakely, Antananarivo, Madagascar
11. Department of Life Science, University of Fianarantsoa, Madagascar
12. Department of Mathematics, University of Fianarantsoa, Madagascar
13. Department of Integrative Biology, University of Wisconsin-Madison, WI, USA
14. Mahaliana Labs SARL, Antananarivo, Madagascar
15. School of Geography and Environmental Science, University of Southampton, Southampton, UK
16. Princeton School of Public and International Affairs, Princeton University, NJ 08450

---

Link to SSA-SARS-CoV-2 online tool: <https://labmetcalf.shinyapps.io/covid19-burden-africa/>

---

Correspondence: [b.rice@princeton.edu](mailto:b.rice@princeton.edu)

1 **Abstract**

2 A surprising feature of the SARS-CoV-2 pandemic to date is the low burdens reported in sub-  
3 Saharan Africa (SSA) countries relative to other global regions. Potential explanations (e.g.,  
4 warmer environments<sup>1</sup>, younger populations<sup>2-4</sup>) have yet to be framed within a comprehensive  
5 analysis accounting for factors that may offset the effects of climate and demography. Here, we  
6 synthesize factors hypothesized to shape the pace of this pandemic and its burden as it moves  
7 across SSA, encompassing demographic, comorbidity, climatic, healthcare and intervention  
8 capacity, and human mobility dimensions of risk. We find large scale diversity in probable  
9 drivers, such that outcomes are likely to be highly variable among SSA countries. While  
10 simulation shows that extensive climatic variation among SSA population centers has little effect  
11 on early outbreak trajectories, heterogeneity in connectivity is likely to play a large role in  
12 shaping the pace of viral spread. The prolonged, asynchronous outbreaks expected in weakly  
13 connected settings may result in extended stress to health systems. In addition, the observed  
14 variability in comorbidities and access to care will likely modulate the severity of infection: We  
15 show that even small shifts in the infection fatality ratio towards younger ages, which are likely  
16 in high risk settings, can eliminate the protective effect of younger populations. We highlight  
17 countries with elevated risk of 'slow pace', high burden outbreaks. Empirical data on the spatial  
18 extent of outbreaks within SSA countries, their patterns in severity over age, and the  
19 relationship between epidemic pace and health system disruptions are urgently needed to guide  
20 efforts to mitigate the high burden scenarios explored here.

21

---

22 The trajectory of the SARS-CoV-2 pandemic in lower latitude, lower income countries including  
23 in Sub-Saharan Africa (SSA) remains uncertain. To date, reported case counts and mortality in  
24 SSA have lagged behind other geographic regions: all SSA countries, with the exception of  
25 South Africa, reported less than 27,000 total cases as of June 2020<sup>5</sup> (**Table S1**) - totals far less  
26 than observed in Asia, Europe, and the Americas<sup>5,6</sup>. However, recent increases in reported  
27 cases in many SSA countries make it unclear whether the relatively few reported cases to date  
28 indicate a reduced epidemic potential or rather an initial delay relative to other regions.

29

30 Correlation between surveillance capacity and case counts<sup>7</sup> obscure early trends in SSA  
31 (**Figure S1**). Experience from locations in which the pandemic has progressed more rapidly  
32 provides a basis of knowledge to assess the relative risk of populations in SSA and identify  
33 those at greatest risk. For example, individuals in lower socio-economic settings have been  
34 disproportionately affected in high latitude countries,<sup>8,9</sup> indicating poverty as an important  
35 determinant of risk. Widespread disruptions to routine health services have been reported<sup>10-12</sup>  
36 and are likely to be an important contributor to the burden of the pandemic in SSA<sup>13</sup>. The role of  
37 other factors from demography<sup>2-4</sup> to health system context<sup>14</sup> and intervention timing<sup>15,16</sup> is also  
38 increasingly well-characterized.

39

#### 40 **Factors expected to increase and decrease SARS-CoV-2 risk in SSA**

41 Anticipating the trajectory of ongoing outbreaks in SSA requires considering variability in known  
42 drivers, and how they may interact to increase or decrease risk across populations in SSA and  
43 relative to non-SSA settings (**Figure 1**). For example, while most countries in SSA have 'young'  
44 populations, suggesting a decreased burden (since SARS-CoV-2 morbidity and mortality  
45 increase with age<sup>2-4</sup>), prevalent infectious and non-communicable comorbidities may  
46 counterbalance this demographic 'advantage'<sup>14,17-19</sup>. Similarly, SSA countries have health  
47 systems that vary greatly in their infrastructure, and dense, resource-limited urban populations  
48 may have fewer options for social distancing<sup>20</sup>. Yet, decentralized, community-based health  
49 systems that benefit from recent experience with epidemic response (e.g., to Ebola<sup>21,22</sup>) can be  
50 mobilized. Climate is frequently invoked as a potential mitigating factor for warmer and wetter  
51 settings<sup>1</sup>, including SSA, but climate varies greatly between population centers in SSA and  
52 large susceptible populations may counteract any climate forcing during initial phases of the  
53 epidemic<sup>23</sup>. Connectivity, at international and subnational scales, also varies greatly<sup>24,25</sup> and  
54 the time interval between viral introductions and the onset of interventions such as lockdowns  
55 will modulate the trajectory<sup>7</sup>. Finally, burdens of malnutrition, infectious diseases, and many

56 other underlying health conditions are higher in SSA (**Table S2**), and their interactions with  
57 SARS-CoV-2 are, as of yet, poorly understood.

58

59 The highly variable social and health contexts of countries in SSA will drive location-specific  
60 variation in the magnitude of the burden, the time-course of the outbreak, and options for  
61 mitigation. Here, we synthesize the range of factors hypothesized to modulate the potential  
62 outcomes of SARS-CoV-2 outbreaks in SSA settings by leveraging existing data sources and  
63 integrating novel SARS-CoV-2 relevant mobility and climate-transmission models. Data on  
64 direct measures and indirect indicators of risk factors were sourced from publicly available  
65 databases including from the WHO, World Bank, UNPOP, DHS, GBD, and WorldPop, and  
66 newly generated data sets (see **Table S3** for details). We organize our assessment around two  
67 aspects that will shape national outcomes and response priorities in the event of widespread  
68 outbreaks: i) the burden, or expected severity of the outcome of an infection, which emerges  
69 from age, comorbidities, and health systems functioning, and ii) the rate of spread within a  
70 geographic area, or pace of the pandemic.

71

72 We group factors that may drive the relative rates of these two features (mortality burden and  
73 pace of the outbreak) along six dimensions of risk: (A) Demographic and socio-economic  
74 parameters related to transmission and burden, (B) Comorbidities relevant to burden, (C)  
75 Climatic variables that may impact the magnitude and seasonality of transmission, (D) Capacity  
76 to deploy prevention measures to reduce transmission, (E) Accessibility and coverage of  
77 existing healthcare systems to reduce burden, and (F) Patterns of human mobility relevant to  
78 transmission (**Table S2**).

79

### 80 **National and subnational variability in SSA**

81 National scale variability in SSA among these dimensions of risk often exceeds ranges  
82 observed across the globe (**Figure 2A-D**). For example, estimates of access to basic  
83 handwashing (i.e., clean water and soap <sup>26</sup>) among urban households in Mali, Madagascar,  
84 Tanzania, and Namibia (62-70%) exceed the global average (58%), but fall to less than 10% for  
85 Liberia, Lesotho, Congo DRC, and Guinea-Bissau (**Figure 2D**). Conversely, the range in the  
86 number of physicians is low in SSA, with all countries other than Mauritius below the global  
87 average (168.78 per 100,000 population) (**Figure 2A**). Yet, estimates are still heterogeneous  
88 within SSA, with, for example, Gabon estimated to have more than 4 times the physicians of  
89 neighboring Cameroon (36.11 and 8.98 per 100,000 population, respectively). This disparity is

90 likely to interact with social contact rates among the elderly in determining exposure and clinical  
91 outcomes (e.g., for variation in household size see **Figure 2E-F**). Relative ranking across  
92 variables is also uneven among countries with the result that this diversity cannot be easily  
93 reduced (e.g., the first two principal components explain only 32.6%, and 13.1% of the total  
94 variance as shown in **Figure S5**), motivating a more holistic approach to projecting burden.

95

### 96 **Severity of infection outcome**

97 To first evaluate variation in the burden emerging from the severity of infection outcome, we  
98 consider how demography, comorbidity, and access to care might modulate the age profile of  
99 SARS-CoV-2 morbidity and mortality<sup>2-4</sup>. Subnational variation in the distribution of high risk age  
100 groups indicates considerable variability, with higher burden expected in urban settings in SSA  
101 (**Figure 3A**), where density and thus transmission are likely higher<sup>27</sup>.

102

103 Comorbidities and access to clinical care also vary across SSA (e.g., for diabetes prevalence  
104 and hospital bed capacity see **Figure 3B**). In comparison to settings where previous SARS-  
105 CoV-2 infection fatality ratio (*IFR*) estimates have been reported, mortality due to  
106 noncommunicable diseases in SSA increases more rapidly with age (**Figure S6**). Consequently,  
107 we explore scenarios where the SARS-CoV-2 *IFR* increases more rapidly with age than the  
108 baseline expected from other settings. Small shifts (e.g., of 2-10 years) in the *IFR* profile result  
109 in large effects on expected mortality for a given level of infection. For example, Chad, Burkina  
110 Faso, and the Central African Republic, while among the youngest SSA countries, have a  
111 relatively high prevalence of diabetes and relatively low density of hospital beds. A five year shift  
112 younger in the *IFR* by age profile of SARS-CoV-2 in these settings would result in nearly a  
113 doubling of mortality, to a rate that would exceed the majority of other, 'older' SSA countries at  
114 the unshifted baseline (**Figure 3C**, see supplement for details of methods). Although there is  
115 greater access to care in older populations by some metrics (**Figure 2A**, correlation between  
116 age and the number of physicians per capita,  $r = 0.896$ ,  $p < 0.001$ ), access to clinical care is  
117 highly variable overall (**Figure 3D**) and maps poorly to indicators of comorbidity (**Figure 3E**).  
118 Empirical data are urgently needed to assess the extent to which the *IFR*-age-comorbidity  
119 associations observed elsewhere are applicable to SSA settings with reduced access to  
120 advanced care. Yet both surveillance and mortality registration<sup>28</sup> are frequently under-  
121 resourced in SSA, complicating both evaluating and anticipating the burden of the pandemic,  
122 and underscoring the urgency of strengthening existing systems<sup>22</sup>.

123

124 **Pandemic pace**

125 Next, we turn to the pace of the pandemic within each country. The frequency of viral  
126 introduction to each country, likely governed by international air travel in SSA<sup>29</sup>, determines  
127 both the timing of the first infections and the number of initial infection clusters that can seed  
128 subsequent outbreaks. The relative importation risk among SSA cities and countries was  
129 assessed by compiling data from 108,894 flights arriving at 113 international airports in SSA  
130 from January to April 2020 (**Figure 4A**), stratified by the SARS-CoV-2 status at the departure  
131 location on the day of travel (**Figure 4B**). A small subset of SSA countries received a  
132 disproportionately large percentage (e.g., South Africa, Ethiopia, Kenya, Nigeria together  
133 contribute 47.9%) of the total travel from countries with confirmed SARS-CoV-2 infections, likely  
134 contributing to variation in the pace of the pandemic across settings<sup>29,30</sup>.

135  
136 Once local chains of infection are established, the rate of spread within countries will be shaped  
137 by efforts to reduce spread, such as handwashing (**Figure 2D**), population contact patterns  
138 including mobility and urban crowding<sup>27</sup> (e.g., **Figure 2C**), and potentially the effect of climatic  
139 variation<sup>1</sup>. Where countries fall across this spectrum of pace will shape interactions with  
140 lockdowns and determine the length and severity of disruptions to routine health system  
141 functioning.

142  
143 Subnational connectivity varies greatly across SSA, both between subregions of a country and  
144 between cities and their rural periphery (e.g., as indicated by travel time to the nearest city over  
145 50,000 population, **Figure 4C**). As expected, in stochastic simulations using estimates of viral  
146 transmission parameters and mobility (assuming no variation in control efforts, see methods), a  
147 smaller cumulative proportion of the population is infected at a given time in countries with  
148 larger populations in less connected subregions (**Figure 4D**). At the national level, susceptibility  
149 declines more slowly and more unevenly in such settings (e.g., Ethiopia, South Sudan,  
150 Tanzania) due to a lower probability of introductions and re-introductions of the virus locally; an  
151 effect amplified by lockdowns. It remains unclear whether the more prolonged, asynchronous  
152 epidemics expected in these countries or the overlapping, concurrent epidemics expected in  
153 countries with higher connectivity (e.g. Malawi, Kenya, Burundi) will be a greater stress to health  
154 systems. Outbreak control efforts are likely to be further complicated during prolonged  
155 epidemics if they intersect with seasonal events such as temporal patterns in human mobility<sup>31</sup>  
156 or other infections (e.g., malaria).

157

158 Turning to climate, despite extreme variation among cities in SSA (**Figure 4E**), large epidemic  
159 peaks are expected in all cities (**Figure 4F**), even from models where transmission rate  
160 significantly declines in warmer, more humid settings. In the absence of interventions, with  
161 transmission rate modified by climate only, peak timing varies only by 4-6 weeks with peaks  
162 generally expected earlier in more southerly, colder, drier, cities (e.g., Windhoek and Maseru)  
163 and later in more humid, coastal cities (e.g., Bissau, Lomé, and Lagos). Apart from these slight  
164 shifts in timing, large susceptible populations overwhelm the effects of climate<sup>23</sup>, and earlier  
165 suggestions that Africa's generally more tropical environment may provide a protective effect<sup>1</sup>  
166 are not supported by evidence.

167

### 168 **Context-specific preparedness in SSA**

169 Our synthesis emphasizes striking country to country variation in drivers of the pandemic in SSA  
170 (**Figure 2**), indicating variation in the burden (**Figure 3**) and pace (**Figure 4**) is to be expected  
171 even across low income settings. As small perturbations in the age profile of mortality could  
172 drastically change the national level burden in SSA (**Figure 3**), building expectations for the risk  
173 for each country requires monitoring for deviations in the pattern of morbidity and mortality over  
174 age. Transparent and timely communication of these context-specific risk patterns could help  
175 motivate population behavioral changes and guide existing networks of community case  
176 management.

177

178 Because the largest impacts of SARS-CoV-2 outbreaks may be through indirect effects on  
179 routine health provisioning, understanding how existing programs may be disrupted differently  
180 by acute versus longer outbreaks is crucial to planning resource allocation. For example,  
181 population immunity will decline proportionally with the length of disruptions to routine  
182 vaccination programs<sup>31</sup>, resulting in more severe consequences in areas with prolonged  
183 epidemic time courses.

184

185 Others have suggested that this crisis presents an opportunity to unify and mobilize across  
186 existing health programs (e.g., for HIV, TB, Malaria, and other NCDs)<sup>22</sup>. While this may be a  
187 powerful strategy in the context of acute, temporally confined crises, long term distraction and  
188 diversion of resources<sup>32</sup> may be harmful in settings with extended, asynchronous epidemics. A  
189 higher risk of infection among healthcare workers during epidemics<sup>33,34</sup> may amplify this risk.

190

191 Due to the lag relative to other geographic regions, many SSA settings retain the opportunity to  
192 prepare for and intervene in the earlier epidemic phases via context-specific deployment of both  
193 routine and pandemic related interventions. As evidenced by failures in locations where the  
194 epidemic progressed rapidly (e.g., USA), effective governance and management prior to  
195 reaching large case counts is likely to yield the largest rewards. Mauritius <sup>35</sup> and Rwanda <sup>36</sup>, for  
196 example, have reported extremely low incidence thanks in part to a well-managed early  
197 response.

198

## 199 **Conclusions**

200 The burden and time-course of SARS-CoV-2 is expected to be highly variable across sub-  
201 Saharan Africa. As the outbreak continues to unfold, critically evaluating this mapping to better  
202 understand where countries lie in terms of their relative risk (e.g., see **Figure 5**) will require  
203 increased surveillance, and timely documentation of morbidity and mortality over age. Case  
204 counts are rising across SSA, but variability in testing regimes makes it difficult to compare  
205 observations to date with expectations in terms of pace (**Figure S7**). The potential to miss large  
206 clusters of cases (in contexts with weaker surveillance), combined with the potential that large  
207 areas remain unreached by the pandemic for longer (as a result of slower 'pace'), indicate that  
208 immunological surveys are likely a powerful lens for understanding the landscape of population  
209 risk <sup>37</sup>. When considering hopeful futures with the possibility of a SARS-CoV-2 vaccine, it is  
210 imperative that vaccine distribution be equitable, and in proportion with need. Understanding  
211 factors that both drive spatial variation in vulnerable populations and temporal variation in  
212 pandemic progression could help approach these goals in SSA.



medRxiv preprint doi: <https://doi.org/10.1101/2020.07.23.20161208>; this version posted July 24, 2020. The copyright holder for this preprint (which was not certified by peer review) is the author/funder, who has granted medRxiv a license to display the preprint in perpetuity. It is made available under a [CC-BY-NC-ND 4.0 International license](https://creativecommons.org/licenses/by-nc-nd/4.0/).

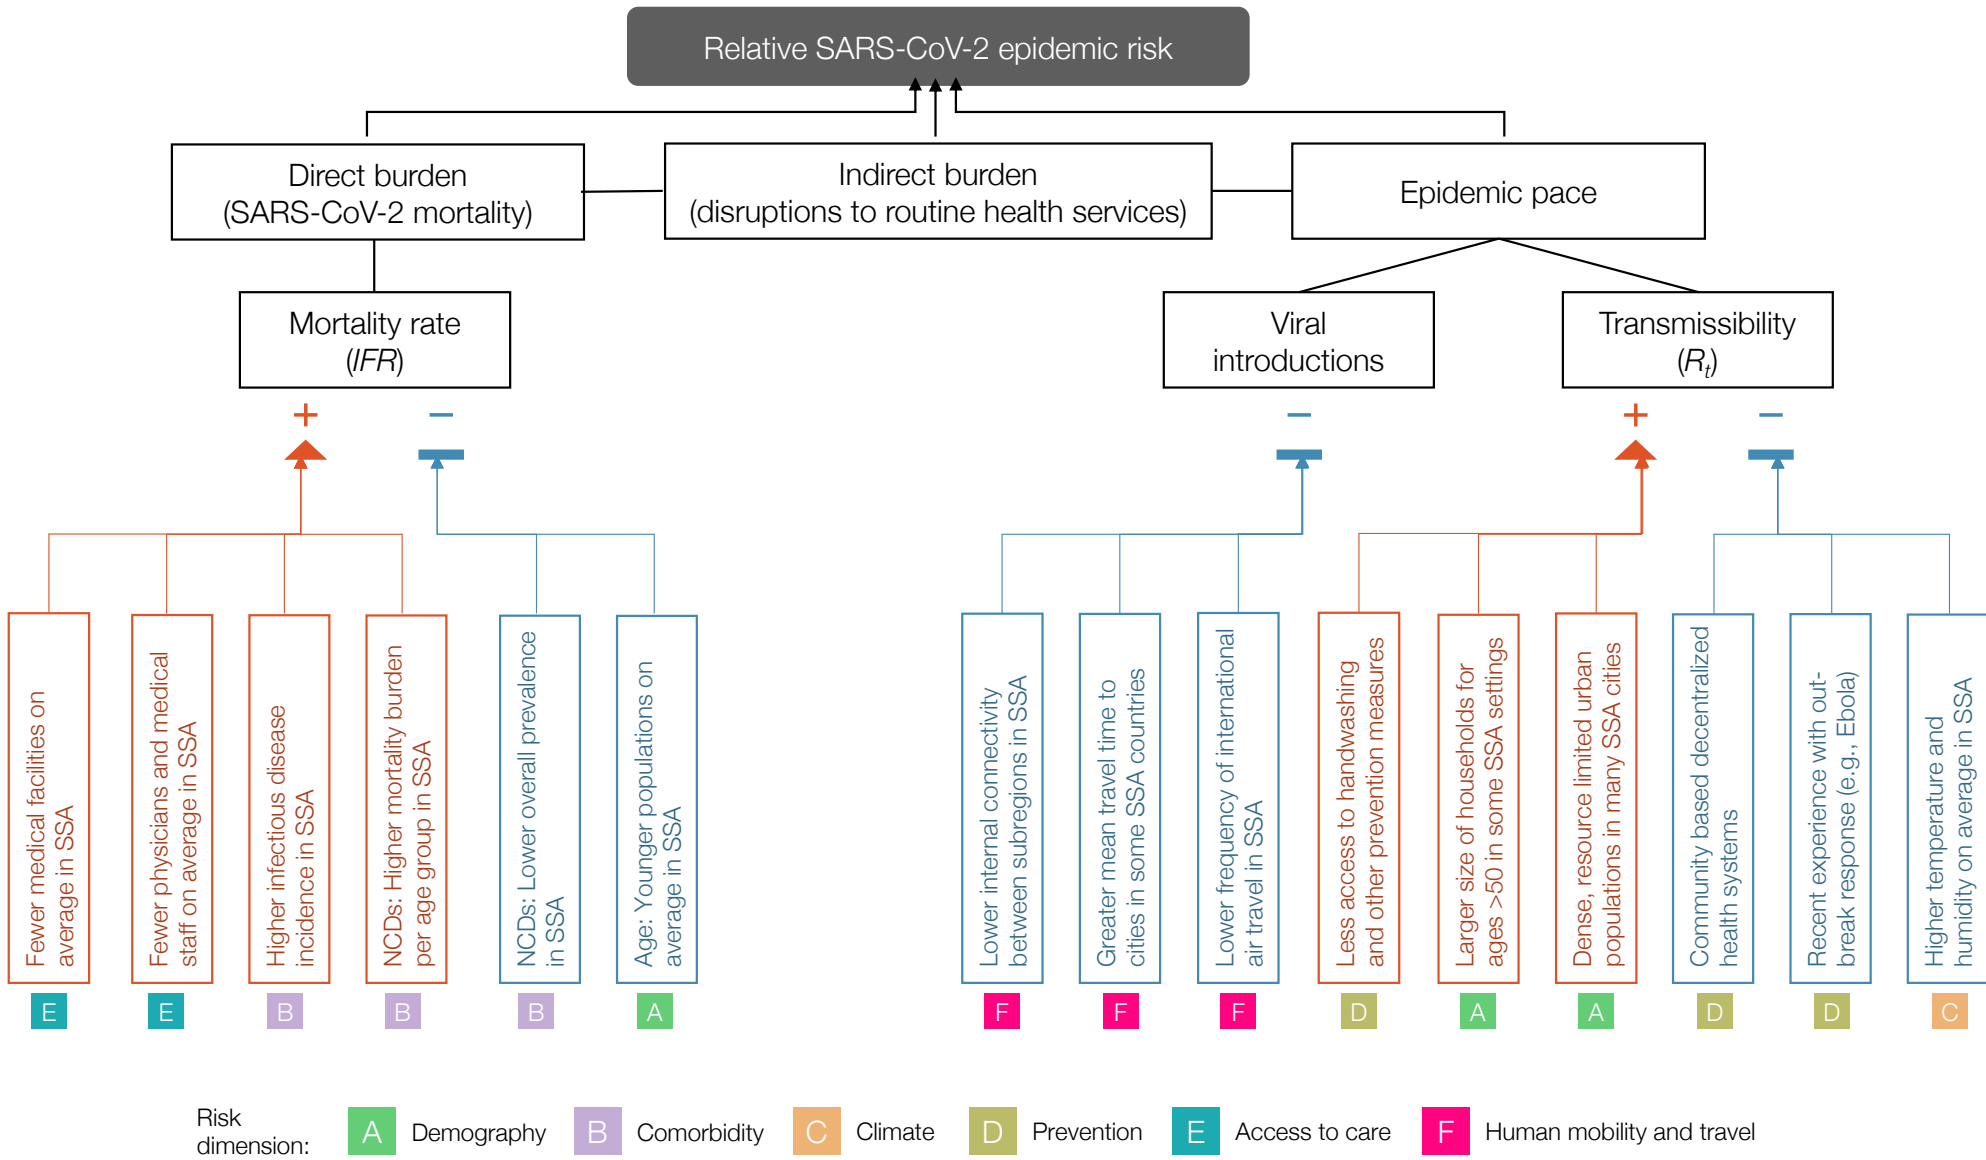

**Figure 1 | Hypothesized modulators of relative SARS-CoV-2 epidemic risk in sub-Saharan Africa**

Factors hypothesized to increase (red) or decrease (blue) mortality burden or epidemic pace within sub-Saharan Africa, relative to global averages, are grouped in six categories or dimensions of risk (A-F). In this framework, epidemic pace is determined by person to person transmissibility (which can be defined as the time-varying effective reproductive number,  $R_t$ ) and introduction and geographic spread of the virus via human mobility.

SARS-CoV-2 mortality (determined by the infection fatality ratio,  $IFR$ ) is modulated by demography, comorbidities (e.g., non-communicable diseases (NCDs)), and access to care. Overall burden is a function of direct burden and indirect effects due to, for example, disruptions in health services such as vaccination and infectious disease control. **Table S2** contains details and the references used as a basis to draw the hypothesized modulating pathways.

medRxiv preprint doi: <https://doi.org/10.1101/2020.07.23.20161208>; this version posted July 24, 2020. The copyright holder for this preprint (which was not certified by peer review) is the author/funder, who has granted medRxiv a license to display the preprint in perpetuity. It is made available under aCC-BY-NC-ND 4.0 International license.

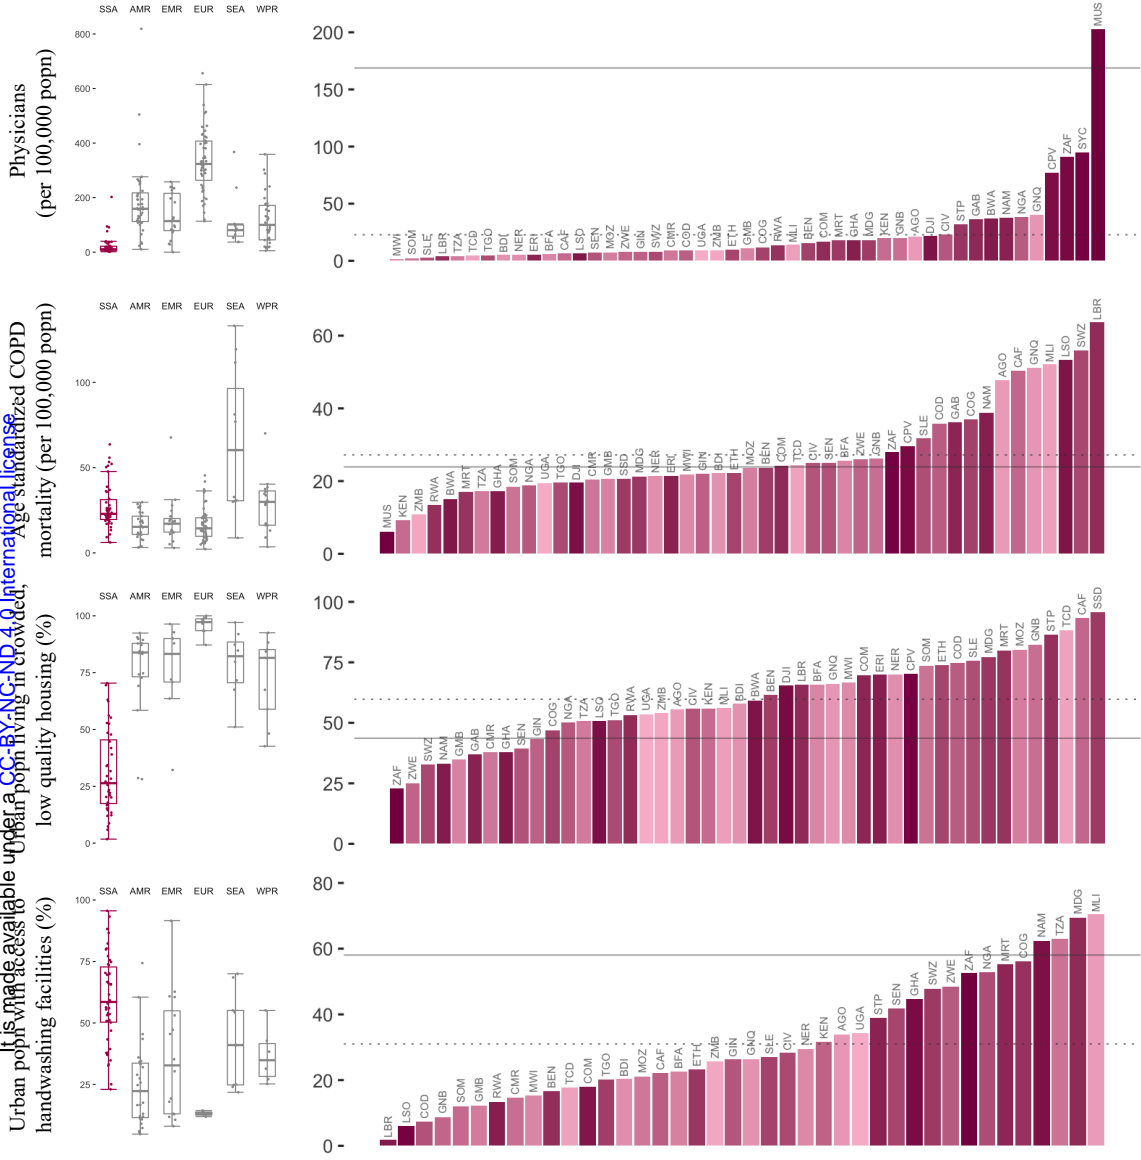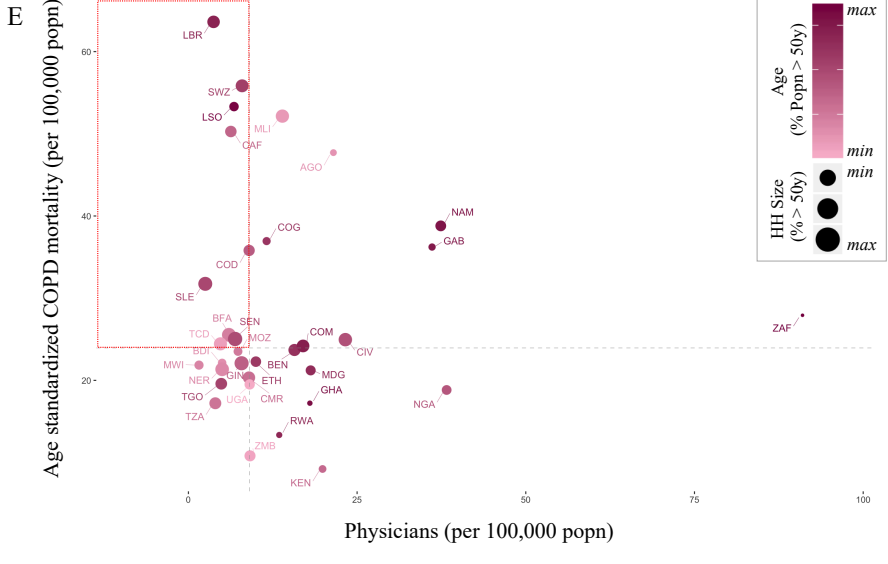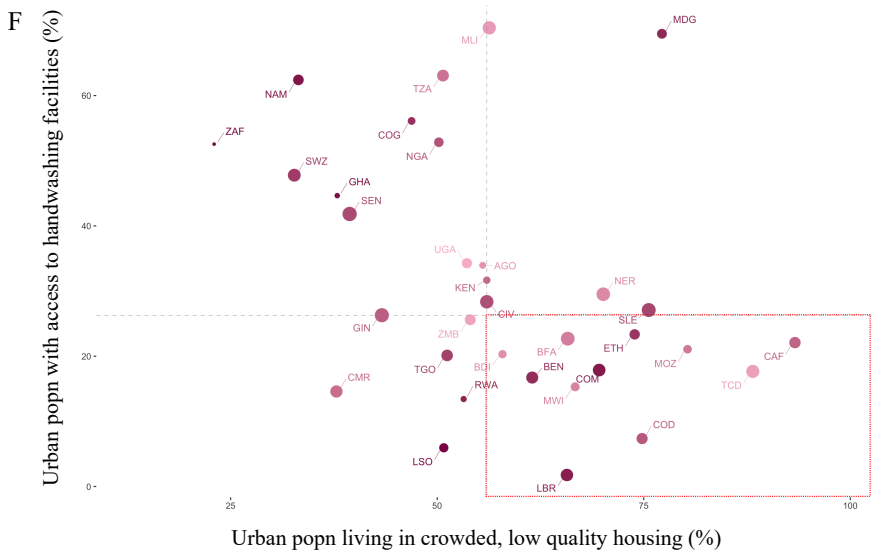

**Figure 2 | Variation among sub-Saharan African countries in select determinants of SARS-CoV-2 risk**

**D:** At right, SSA countries are ranked from least to greatest for each indicator; bar color shows population age structure (% of the population above age 50). Solid horizontal lines show the global mean value; dotted lines show the mean among SSA countries. At left, boxplots show median and interquartile range, grouped by geographic region, per WHO: sub-Saharan Africa (SSA); Americas Region (AMR); Eastern Mediterranean Region (EMR); Europe Region (EUR); Southeast Asia Region (SEA); Western Pacific Region (WPR).

**E-F:** Dot size shows mean household (HH) size for HHs with individuals over age 50; dashed lines show median value among SSA countries; quadrants of greatest risk are outlined in red (e.g., fewer physicians and greater age standardized Chronic Obstructive Pulmonary Disease (COPD) mortality). See Table S3, Figure S3, and the [SSA-SARS-CoV-2-tool](#) for full description and visualization of all variables.

medRxiv preprint doi: <https://doi.org/10.1101/2020.07.23.20161208>; this version posted July 24, 2020. The copyright holder for this preprint (which was not certified by peer review) is the author/funder, who has granted medRxiv a license to display the preprint in perpetuity. It is made available under a [CC-BY-NC-ND 4.0 International license](https://creativecommons.org/licenses/by-nc-nd/4.0/).

**A |** Baseline mortality risk from demographic structure

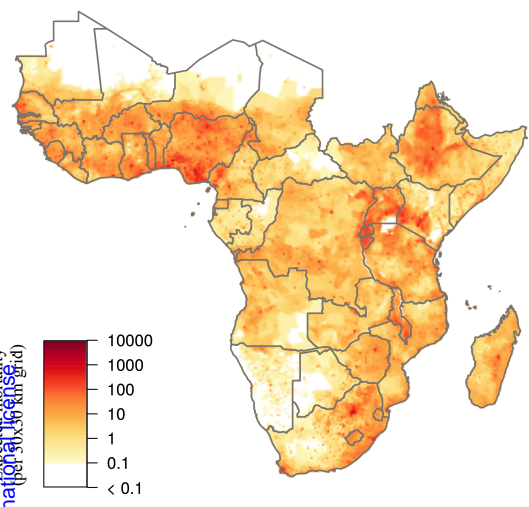

**B |** Comorbidity vs access to care

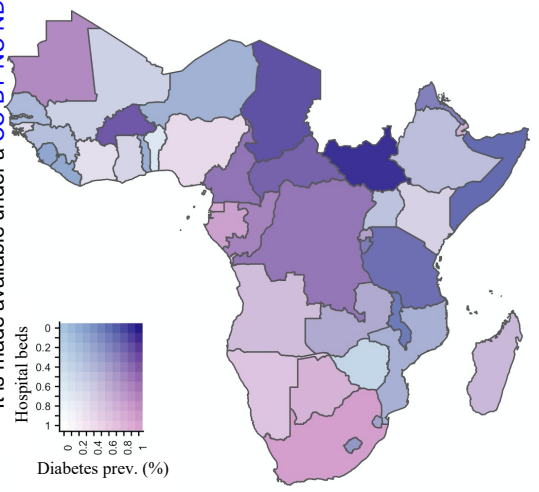

**C |** Range in mortality under simulated IFR scenarios

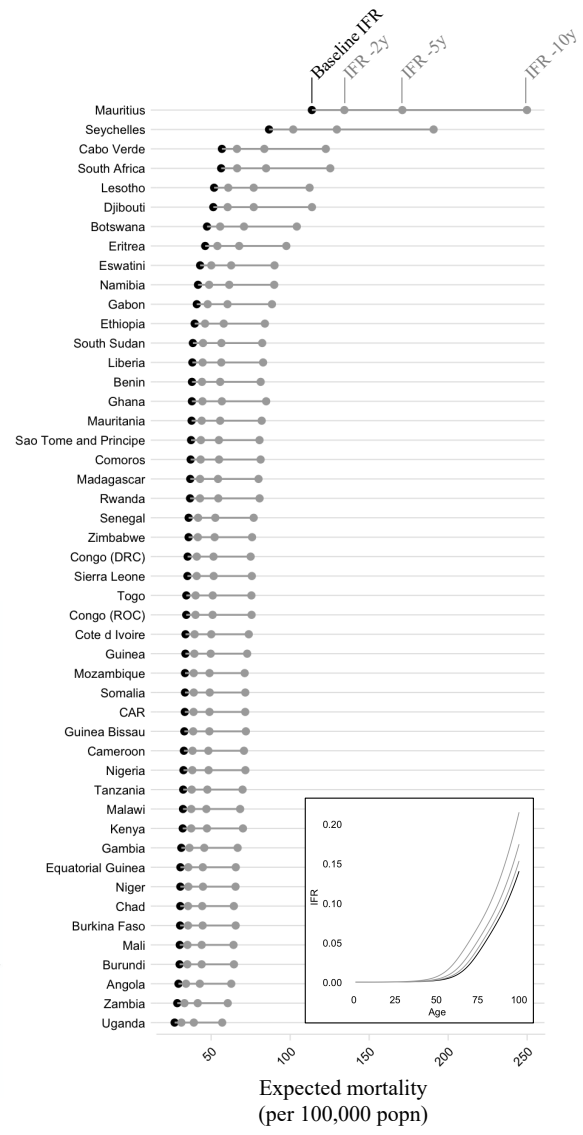

**D |** Indicators of access to care at national level

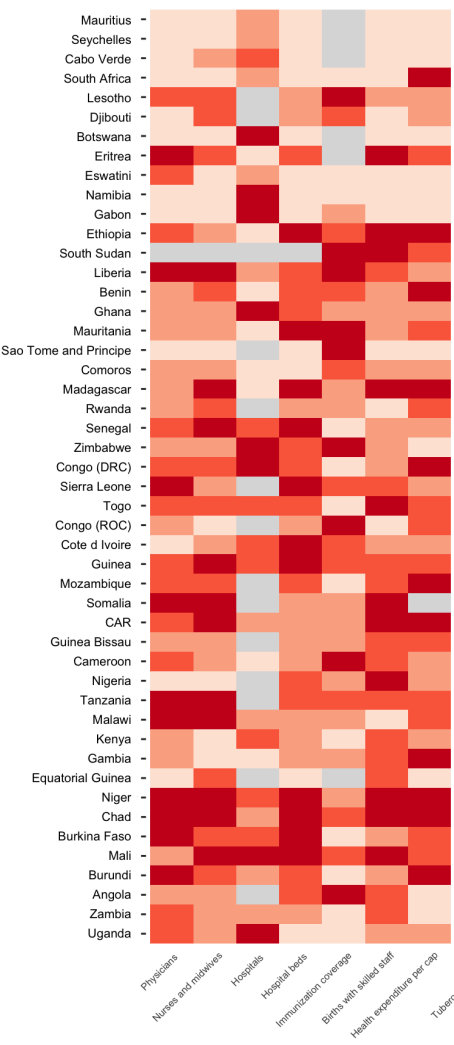

**E |** Indicators of comorbidity burden at national level

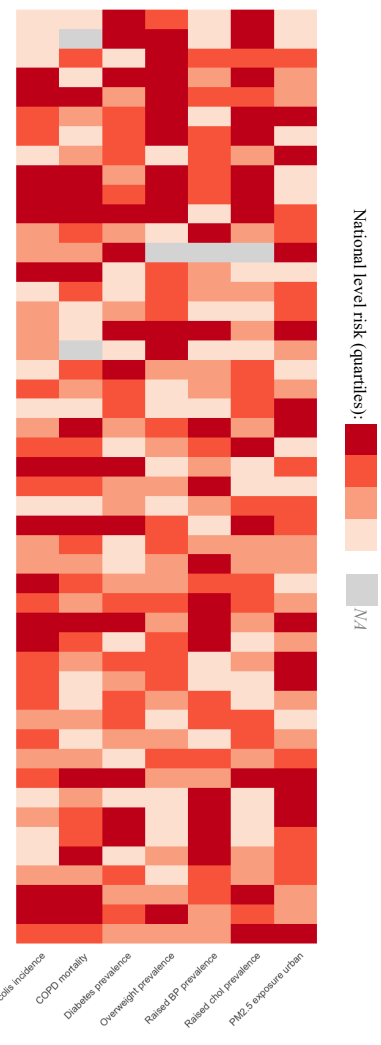

**Figure 3 | Variation in expected burden for SARS-CoV-2 outbreaks in sub-Saharan Africa**

Expected mortality in a scenario where cumulative infection reaches 20% across age groups and the infection fatality ratio (*IFR*) curve is fit to existing age-stratified *IFR* estimates (see methods, **Table S4**). **B:** National level variation in comorbidity and access to care variables, for e.g., diabetes prevalence among adults and the number of hospital beds per 100,000 population for sub-Saharan African countries. **C:** The range in mortality per 100,000 population expected in scenarios where cumulative infection rate is 20% and *IFR* per age is the baseline (black) or shifted 2, 5, or 10 years younger (gray). Inset, the *IFR* by age curves for each scenario.

**D-E:** Select national level indicators; estimates of reduced access to care (e.g., fewer hospitals) or increased comorbidity burden (e.g., higher prevalence of raised blood pressure) shown with darker red for higher risk quartiles (see **Figure S4** for all indicators). Countries missing data for an indicator (NA) are shown in gray. For comparison between countries, estimates are age-standardized where applicable (see **Table S3** for details). See the [\[SSA-SARS-CoV-2-tool\]](#) for high resolution maps for each variable and scenario.

medRxiv preprint doi: <https://doi.org/10.1101/2020.07.23.20161208>; this version posted July 24, 2020. The copyright holder for this preprint (which was not certified by peer review) is the author/funder, who has granted medRxiv a license to display the preprint in perpetuity. It is made available under aCC-BY-NC-ND 4.0 International license.

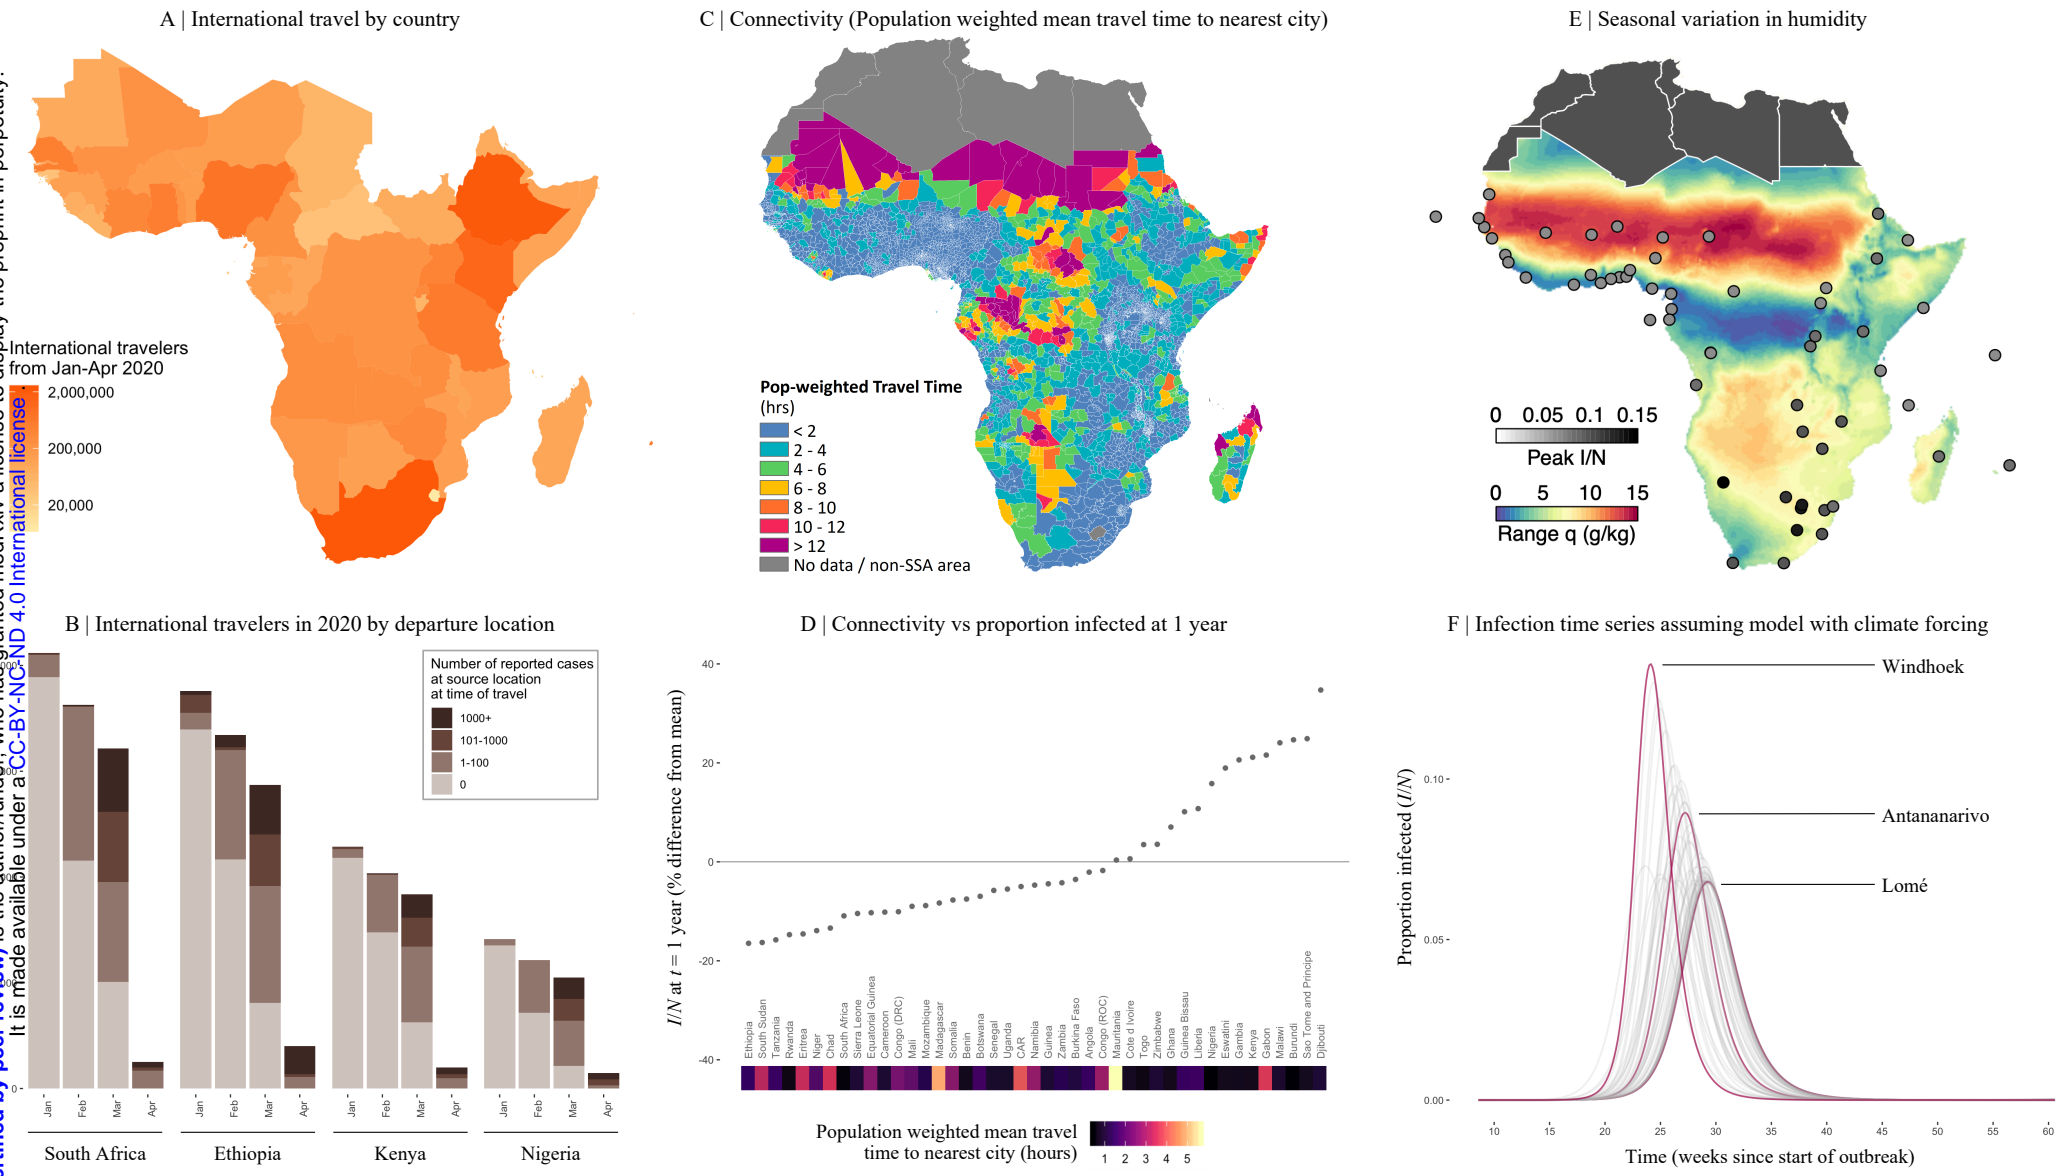

**Figure 4 | Variation in connectivity and climate in sub-Saharan Africa and expected effects on SARS-CoV-2**

**A:** International travelers to sub-Saharan Africa (SSA) from January to April 2020, as inferred from the number of passenger seats on arriving aircraft. **B:** For the four countries with the most arrivals, the proportion of arrivals by month coming from countries with 0, 1-100, 101-1000, and 1000+ reported SARS-CoV-2 infections at the time of travel (see **Table S5** for all others). **C:** Connectivity within SSA countries as inferred from average population weighted mean travel time to the nearest urban area greater than 50,000 population.

**D:** Mean travel time at the national level and variation in the fraction of the population expected to be infected ( $I/N$ ) in the first year from stochastic simulations (see methods). **E:** Climate variation across SSA as shown by seasonal range in specific humidity,  $q$  (g/kg) (max average  $q$  - min average  $q$ ). Circles show peak proportion infected. **F:** The effect of local seasonality in SSA cities on outbreaks ( $I/N$  over time) in susceptible populations beginning in March 2020 (see methods).

medRxiv preprint doi: <https://doi.org/10.1101/2020.07.23.20161208>; this version posted July 24, 2020. The copyright holder for this preprint (which was not certified by peer review) is the author/funder, who has granted medRxiv a license to display the preprint in perpetuity. It is made available under a [CC-BY-NC-ND 4.0 International license](https://creativecommons.org/licenses/by-nc-nd/4.0/).

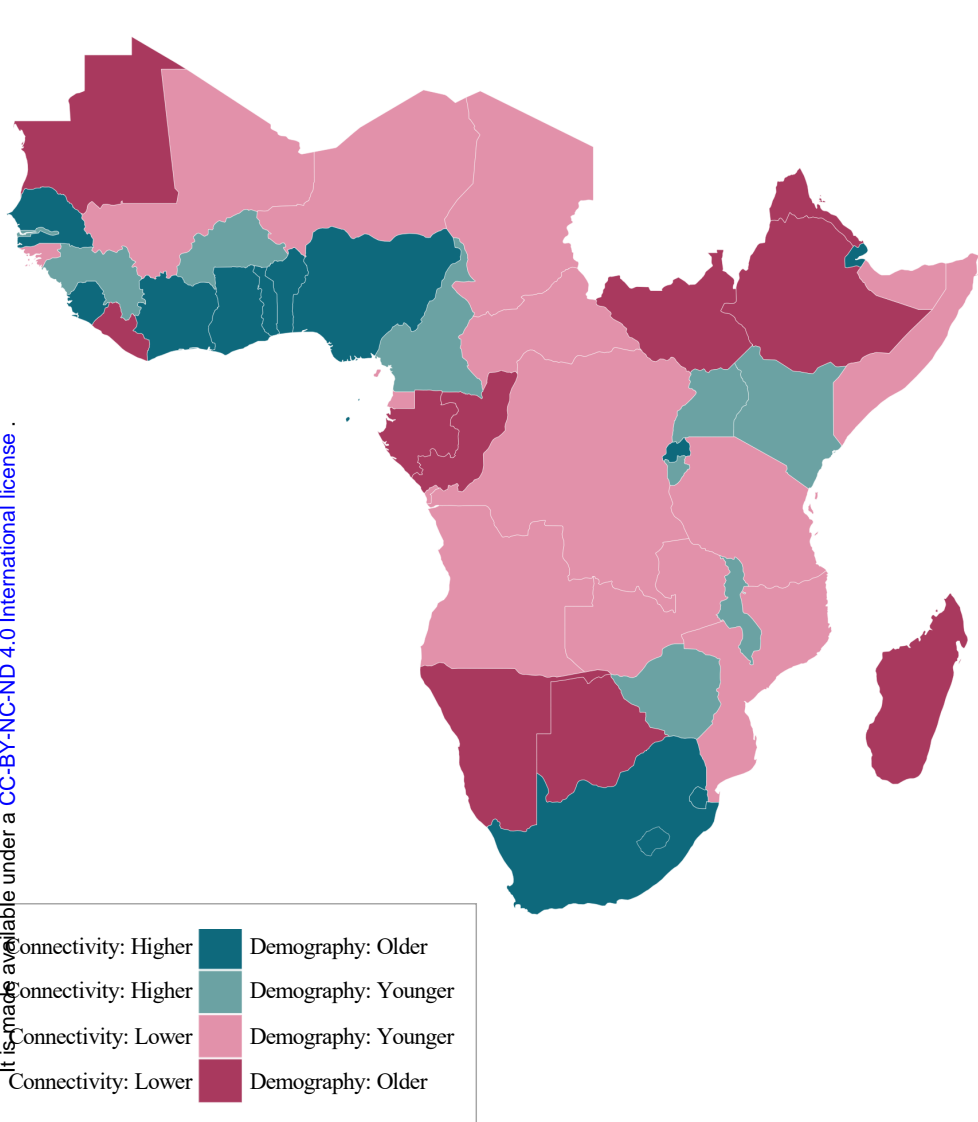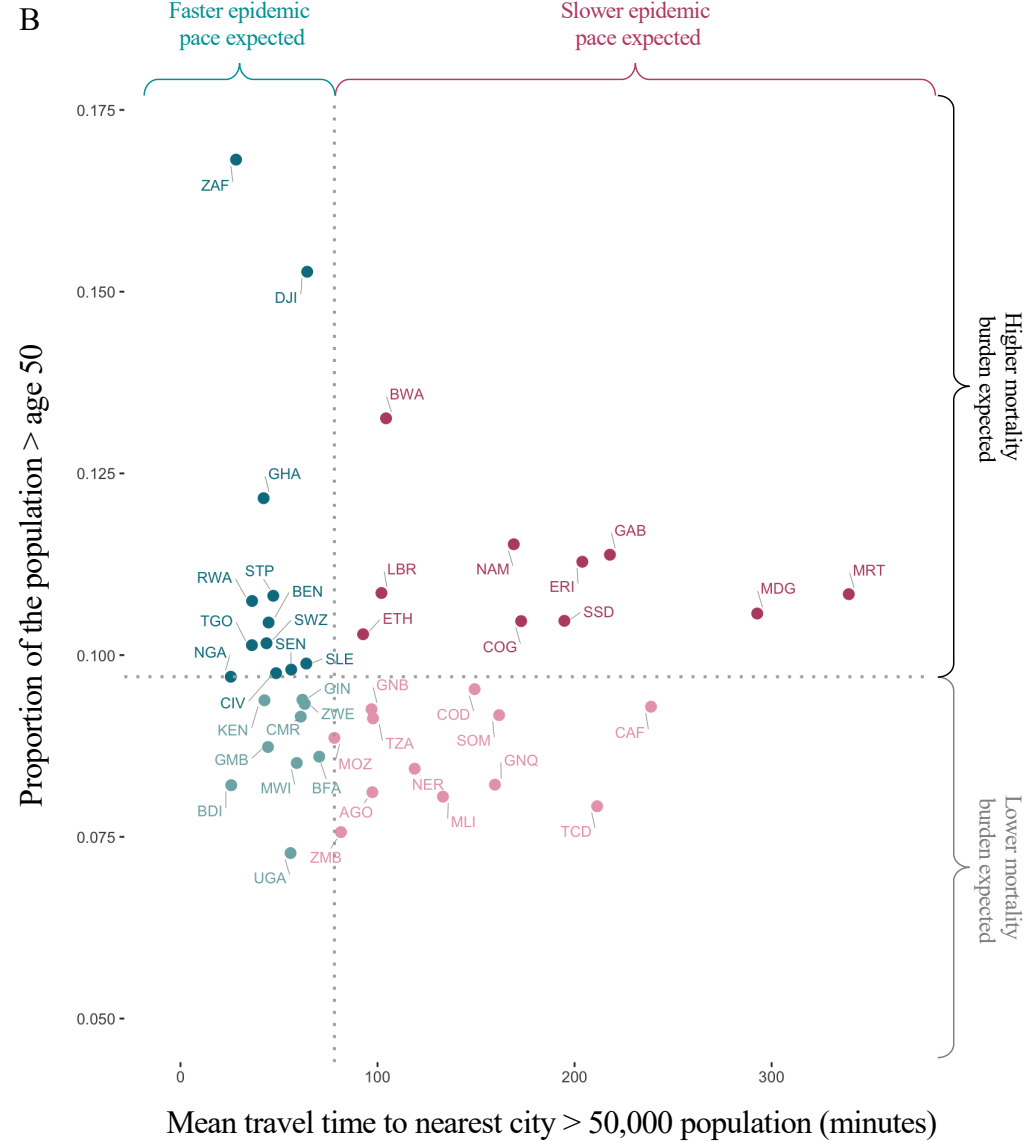

**Figure 5 | Expected pace versus expected burden at the national level in SARS-CoV-2 outbreaks in sub-Saharan Africa**

Countries are colored by with respect to indicators of their expected epidemic pace (using as an example subnational connectivity in terms of travel time to nearest city) and potential burden (using as an example the proportion of the population over age 50).

**A:** In pink, countries with less connectivity (i.e., less synchronous outbreaks) relative to the median among SSA countries; in blue, countries with more connectivity; darker colors show countries with older populations (i.e., a greater proportion in higher risk age groups).

**B:** Dotted lines show the median; in the upper right, in dark pink, countries are highlighted due to their increased potential risk for an outbreak to be prolonged (see metapopulation model methods) and high burden (see burden estimation methods).

## 213 **Online Content**

214 Methods, additional references, data, and detailed visualizations of variation in each of the  
215 variables and simulations can be accessed in the supplementary materials and online through  
216 an interactive tool [[SSA-SARS-CoV-2-tool](#)], which also contains code (in R).

217

## 218 **Acknowledgements**

219 REB is supported by the Cooperative Institute for Modeling the Earth System (CIMES). AA  
220 acknowledges support from the NIH Medical Scientist Training Program 1T32GM136577. AJT is  
221 funded by the BMGF (OPP1182425, OPP1134076 and INV-002697). MB is funded by NWO  
222 Rubicon grant 019.192EN.017.

223

## 224 **Author contributions**

225 *Conceptualization*: BLR, AA, REB, MB, WWD, KM, IFM, NVM, AR, MR, JR, TR, FR, WY, BTG,  
226 CJT, CJEM; *Data curation*: BLR, MR, MB, WWD, WY; *Formal analysis*: BLR, AA, MB, MR,  
227 REB; *Methodology*: BLR, MR, MB, REB, CJEM, BTG; *Software and Shiny app online tool*: BLR,  
228 MR, MB, REB, WY; *Visualization*: BLR, MR, MB, REB, WY; *Writing – original draft*: BLR, CJEM;  
229 *Writing – reviewing and editing*: BLR, AA, REB, MB, WWD, KM, IFM, NVM, AR, MR, JR, TR,  
230 FR, WY, BTG, CJT, CJEM

231

## 232 **Additional Information**

233 Supplementary Information is available for this paper. Correspondence and requests for  
234 materials should be addressed to BLR ([b.rice@princeton.edu](mailto:b.rice@princeton.edu))

235

## 236 **Data and materials availability**

237 All materials are available in the online content

238

## 239 **Competing interests**

240 The authors declare no competing interests

## Supplementary Materials Outline:

### A1 Reported SARS-CoV-2 case counts, mortality, and testing in sub-Saharan Africa as of June 2020

Table S1: Sub-Saharan Africa country codes, case counts, and testing

Figure S1: Variation between SSA countries in testing and reporting rates

### A2 Synthesizing factors hypothesized to increase or decrease SARS-CoV-2 epidemic risk in SSA

Table S2: Dimensions of risk and expected direction of effect on SARS-CoV-2 transmission or burden in sub-Saharan Africa (SSA) relative to higher latitude countries

Table S3: Variables and data sources

Figure S2: Year of most recent data available for variables compared between global regions

Figure S3: Variation among sub-Saharan African countries in determinants of SARS-CoV-2 risk by variable (a subset of variables is shown in Figure 2 in the main text)

Figure S4: Variation among sub-Saharan African countries in determinants of SARS-CoV-2 mortality risk by category (subsets of variables are shown in Figure 3 in the main text)

Data File 1: Data for all compiled indicators

### A3 Principal component analysis (PCA) of variables considered

Figure S5: PCAs of all variables and category specific subsets of variables

Data File 2: GDP, GINI Index, and tests completed data for PCA visualizations

### A4 Evaluating the burden emerging from the severity of infection outcome

Table S4: Sources of age-stratified infection fatality ratio (*IFR*) estimates

Figure S6: Age profiles of comorbidities in sub-Saharan Africa countries

### A5 International air travel to sub-Saharan Africa

Table S5: Arrivals to SSA airports by the number of passenger seats and status of the SARS-CoV-2 pandemic at the origin at the time of travel

### A6 Subnational connectivity among countries in sub-Saharan Africa

Metapopulation model methods

Figure S7: Pace of the outbreak

Figure S8: Cases and testing vs. the pace of the outbreak

### A7 Modeling epidemic trajectories in scenarios where transmission rate depends on climate

Data on climate variation in SSA

Climate model methods

## 1 **A1 | Reported SARS-CoV-2 case counts, mortality, and testing in sub-** 2 **Saharan Africa as of June 2020**

### 3 4 *1.1. Variables and data sources for testing data*

5  
6 The numbers of reported cases, deaths, and tests for the 48 studied sub-Saharan Africa (SSA)  
7 countries (**Table S1**) were sourced from the Africa Centers for Disease Control (CDC)  
8 dashboard on June 30, 2020 (<https://africacdc.org/covid-19/>). Africa CDC obtains data from the  
9 official Africa CDC Regional Collaborating Centre and member state reports. Differences in the  
10 timing of reporting by member states results in some variation in recency of data within the  
11 centralized Africa CDC repository, but the data should broadly reflect the relative scale of testing  
12 and reporting efforts across countries.

13  
14 The countries or member states within SSA in this study follow the United Nations and Africa  
15 CDC listed regions of Southern, Western, Central, and Eastern Africa (not including Sudan).  
16 From the Northern Africa region, Mauritania is included in SSA.

17  
18 For comparison to non-SSA countries, the number of reported cases in other geographic  
19 regions were obtained from the Johns Hopkins University Coronavirus Resource Center on  
20 June 30, 2020 (<https://coronavirus.jhu.edu/map.html>).

21  
22 Case fatality ratios (*CFRs*) were calculated by dividing the number of reported deaths by the  
23 number of reported cases and expressed as a percentage. Positivity was calculated by dividing  
24 the number of reported cases by the number of reported tests. Testing and case rates were  
25 calculated per 100,000 population using population size estimates for 2020 from the United  
26 Nations Population Division<sup>38</sup>. As reported confirmed cases are likely to be a significant  
27 underestimate of the true number of infections, *CFRs* may be a poor proxy for the infection  
28 fatality ratio (*IFR*), defined as the proportion of infections that result in mortality<sup>4</sup>.

### 29 30 *1.2 Variation in testing and mortality rates*

31  
32 Testing rates among SSA countries varied by multiple orders of magnitude: the number of tests  
33 completed per 100,000 population ranged from 6.50 in Tanzania to 13,508.13 in Mauritius  
34 (**Figure S1A**). The number of reported infections (i.e., positive tests) was strongly correlated  
35 with the number of tests completed (Pearson's correlation coefficient,  $r = 0.9667$ ,  $p < 0.001$ )  
36 (**Figure S1B**). As of June 30, 2020, no deaths due to SARS-CoV-2 were reported to the Africa  
37 CDC for five SSA countries (Eritrea, Lesotho, Namibia, Seychelles, Uganda). Among countries  
38 with at least one reported death, *CFR* varied from 0.22% in Rwanda to 8.54% in Chad (**Figure**  
39 **S1C**). Limitations in the ascertainment of infection rates and the rarity of reported deaths (e.g.,  
40 median number of reported deaths per SSA country was 25.5), indicate that the data are  
41 insufficient to determine country specific *IFRs* and *IFR* by age profiles. As a result, global *IFR* by  
42 age estimates were used for the subsequent analyses in this study.



43 **Table S1**  
 44 **Sub-Saharan Africa country country codes, case counts, and testing as of June 30, 2020**

| Country Name            | Country Code | Cases <sup>a</sup> | Deaths <sup>a</sup> | Tests <sup>a</sup> | Population <sup>b</sup> | Cases per 100k <sup>c</sup> | Tests per 100k <sup>c</sup> | Positivity (%) | CFR (%) |
|-------------------------|--------------|--------------------|---------------------|--------------------|-------------------------|-----------------------------|-----------------------------|----------------|---------|
| Angola                  | AGO          | 267                | 11                  | 22895              | 32866268                | 0.81                        | 69.66                       | 1.17           | 4.12    |
| Benin                   | BEN          | 1187               | 19                  | 20014              | 12123198                | 9.79                        | 165.09                      | 5.93           | 1.60    |
| Botswana                | BWA          | 89                 | 1                   | 36868              | 2351625                 | 3.78                        | 1567.77                     | 0.24           | 1.12    |
| Burkina Faso            | BFA          | 959                | 53                  | 9040               | 20903278                | 4.59                        | 43.25                       | 10.61          | 5.53    |
| Burundi                 | BDI          | 170                | 1                   | 2359               | 11890781                | 1.43                        | 19.84                       | 7.21           | 0.59    |
| Cameroon                | CMR          | 12592              | 313                 | 80000              | 26545864                | 47.43                       | 301.37                      | 15.74          | 2.49    |
| Cabo Verde              | CPV          | 1165               | 12                  | 22665              | 555988                  | 209.54                      | 4076.53                     | 5.14           | 1.03    |
| Central Africa Republic | CAF          | 3429               | 45                  | 23208              | 4829764                 | 71.00                       | 480.52                      | 14.78          | 1.31    |
| Chad                    | TCD          | 866                | 74                  | 4633               | 16425859                | 5.27                        | 28.21                       | 18.69          | 8.55    |
| Comoros                 | COM          | 293                | 7                   | 1173               | 869595                  | 33.69                       | 134.89                      | 24.98          | 2.39    |
| Côte d'Ivoire           | CIV          | 9101               | 66                  | 48340              | 26378275                | 34.50                       | 183.26                      | 18.83          | 0.73    |
| Congo (DRC)             | COD          | 6939               | 167                 | 24657              | 89561404                | 7.75                        | 27.53                       | 28.14          | 2.41    |
| Djibouti                | DJI          | 4656               | 53                  | 46108              | 988002                  | 471.25                      | 4666.79                     | 10.10          | 1.14    |
| Equatorial Guinea       | GNQ          | 2001               | 32                  | 16000              | 1402985                 | 142.62                      | 1140.43                     | 12.51          | 1.60    |
| Eritrea                 | ERI          | 191                | 0                   | 7943               | 3546427                 | 5.39                        | 223.97                      | 2.40           | 0.00    |
| Eswatini                | SWZ          | 781                | 11                  | 11094              | 1160164                 | 67.32                       | 956.24                      | 7.04           | 1.41    |
| Ethiopia                | ETH          | 5846               | 103                 | 250604             | 114963583               | 5.09                        | 217.99                      | 2.33           | 1.76    |
| Gabon                   | GAB          | 5209               | 40                  | 34774              | 2225728                 | 234.04                      | 1562.37                     | 14.98          | 0.77    |
| Gambia                  | GMB          | 45                 | 2                   | 2947               | 2416664                 | 1.86                        | 121.94                      | 1.53           | 4.44    |
| Ghana                   | GHA          | 17351              | 112                 | 294867             | 31072945                | 55.84                       | 948.95                      | 5.88           | 0.65    |
| Guinea                  | GIN          | 5291               | 30                  | 33737              | 13132792                | 40.29                       | 256.89                      | 15.68          | 0.57    |
| Guinea Bissau           | GNB          | 1614               | 21                  | 8056               | 1967998                 | 82.01                       | 409.35                      | 20.03          | 1.30    |
| Kenya                   | KEN          | 6190               | 144                 | 167417             | 53771300                | 11.51                       | 311.35                      | 3.70           | 2.33    |
| Lesotho                 | LSO          | 27                 | 0                   | 3000               | 2142252                 | 1.26                        | 140.04                      | 0.90           | 0.00    |
| Liberia                 | LBR          | 768                | 34                  | 6125               | 5057677                 | 15.18                       | 121.10                      | 12.54          | 4.43    |

45  
 46  
 47

48 (Table S1 continued)

| Country Name          | Country Code | Cases <sup>a</sup> | Deaths <sup>a</sup> | Tests <sup>a</sup> | Population <sup>b</sup> | Cases per 100k <sup>c</sup> | Tests per 100k <sup>c</sup> | Positivity (%) | CFR (%) |
|-----------------------|--------------|--------------------|---------------------|--------------------|-------------------------|-----------------------------|-----------------------------|----------------|---------|
| Madagascar            | MDG          | 2138               | 20                  | 21444              | 27691019                | 7.72                        | 77.44                       | 9.97           | 0.94    |
| Malawi                | MWI          | 1152               | 13                  | 13369              | 19129955                | 6.02                        | 69.89                       | 8.62           | 1.13    |
| Mali                  | MLI          | 2147               | 113                 | 12869              | 20250834                | 10.60                       | 63.55                       | 16.68          | 5.26    |
| Mauritania            | MRT          | 4149               | 126                 | 39398              | 4649660                 | 89.23                       | 847.33                      | 10.53          | 3.04    |
| Mauritius             | MUS          | 341                | 10                  | 171792             | 1271767                 | 26.81                       | 13508.13                    | 0.20           | 2.93    |
| Mozambique            | MOZ          | 859                | 5                   | 28586              | 31255435                | 2.75                        | 91.46                       | 3.00           | 0.58    |
| Namibia               | NAM          | 183                | 0                   | 8706               | 2540916                 | 7.20                        | 342.63                      | 2.10           | 0.00    |
| Niger                 | NER          | 1074               | 67                  | 6555               | 24206636                | 4.44                        | 27.08                       | 16.38          | 6.24    |
| Nigeria               | NGA          | 24567              | 565                 | 130164             | 206139587               | 11.92                       | 63.14                       | 18.87          | 2.30    |
| Congo (ROC)           | COG          | 1245               | 40                  | 11790              | 5518092                 | 22.56                       | 213.66                      | 10.56          | 3.21    |
| Rwanda                | RWA          | 900                | 2                   | 137751             | 12952209                | 6.95                        | 1063.53                     | 0.65           | 0.22    |
| São Tomé and Príncipe | STP          | 713                | 13                  | 17773              | 219161                  | 325.33                      | 8109.56                     | 4.01           | 1.82    |
| Senegal               | SEN          | 6698               | 108                 | 76343              | 16743930                | 40.00                       | 455.94                      | 8.77           | 1.61    |
| Seychelles            | SYC          | 77                 | 0                   | 704                | 98340                   | 78.30                       | 715.88                      | 10.94          | 0.00    |
| Sierra Leone          | SLE          | 1427               | 60                  | 9973               | 7976985                 | 17.89                       | 125.02                      | 14.31          | 4.20    |
| Somalia               | SOM          | 2894               | 90                  | 11807              | 15893219                | 18.21                       | 74.29                       | 24.51          | 3.11    |
| South Africa          | ZAF          | 138134             | 2456                | 1567084            | 59308690                | 232.91                      | 2642.25                     | 8.81           | 1.78    |
| South Sudan           | SSD          | 2006               | 37                  | 10630              | 11193729                | 17.92                       | 94.96                       | 18.87          | 1.84    |
| Tanzania              | TZA          | 509                | 21                  | 3880               | 59734213                | 0.85                        | 6.50                        | 13.12          | 4.13    |
| Togo                  | TGO          | 642                | 14                  | 30316              | 8278737                 | 7.75                        | 366.19                      | 2.12           | 2.18    |
| Uganda                | UGA          | 870                | 0                   | 186200             | 45741000                | 1.90                        | 407.07                      | 0.47           | 0.00    |
| Zambia                | ZMB          | 1531               | 21                  | 53370              | 18383956                | 8.33                        | 290.31                      | 2.87           | 1.37    |
| Zimbabwe              | ZWE          | 567                | 6                   | 66712              | 14862927                | 3.81                        | 448.85                      | 0.85           | 1.06    |

49

50 <sup>a</sup> Data from Africa CDC as of June 30, 2020 (<https://africacdc.org/covid-19/>)

51 <sup>b</sup> Data from UN Population Division UNPOP (2019 revision) estimates of population by single calendar year (2020)<sup>38</sup>

52 <sup>c</sup> Rates per 100,000 population

53

54 **Figure S1**

55 **Variation between SSA countries in testing and reporting rates as of June 30, 2020**

56 **A:** Reported number of tests completed per country as of June 2020 (source: Africa CDC). **B:** Number of infections (*I*)  
57 per reported number of tests (*T*); line shows linear regression:  $I = 8.454 \times 10^{-2} \times T - 8.137 \times 10^2$  ( $R^2 = 0.933$ ,  $p < 0.001$ ).

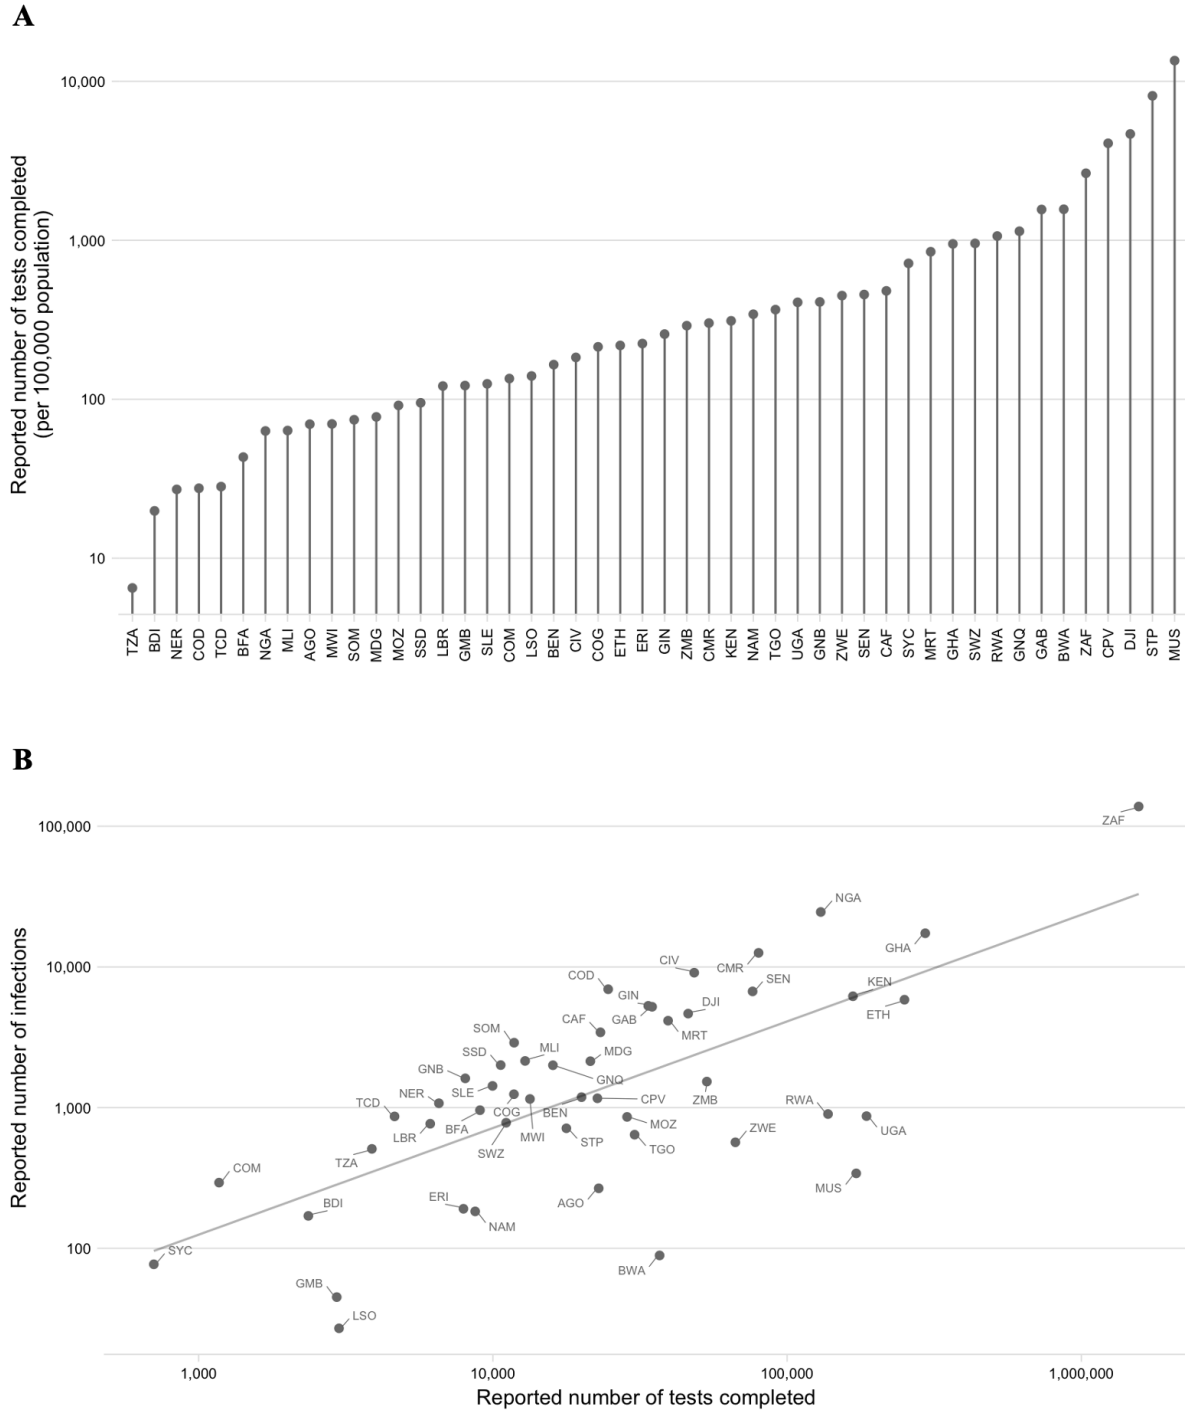

58  
59

60 (Figure S1 continued)  
 61 **C:** Reported infections and deaths for sub-Saharan African countries with case fatality ratios (CFRs) shown as  
 62 diagonal lines. **D:** Date of first detection per number of reported tests

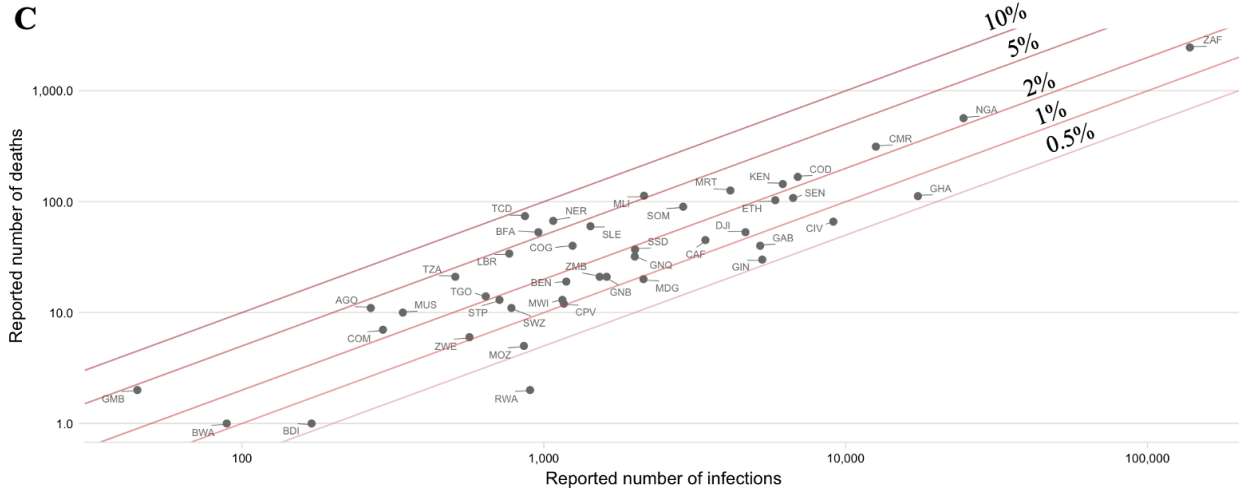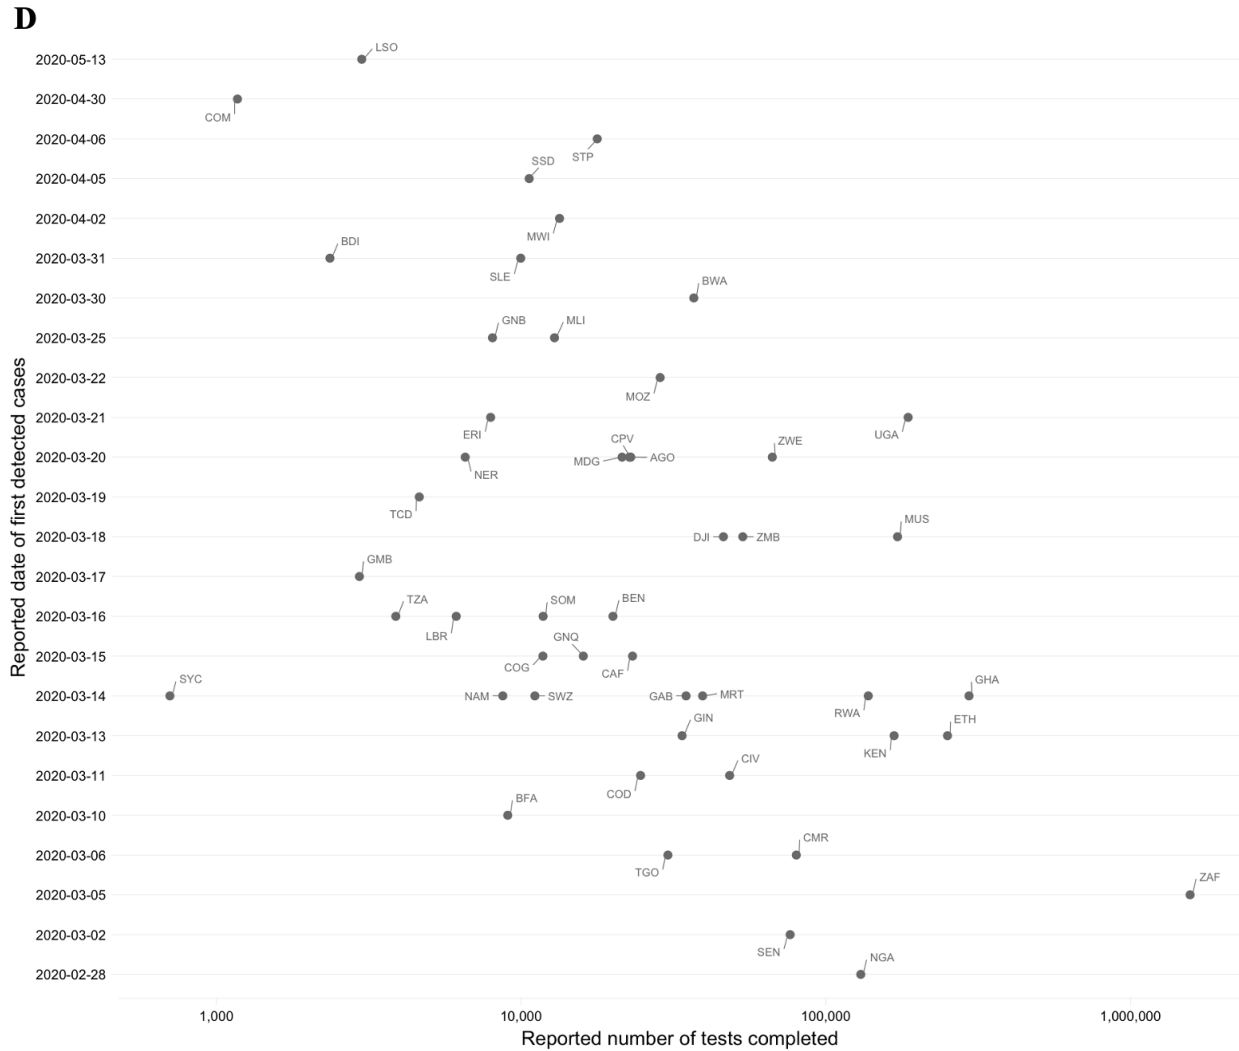

63

## 64 **A2 | Methods: Synthesizing factors hypothesized to increase or** 65 **decrease SARS-CoV-2 epidemic risk in SSA**

### 66 67 *2.1. Variable selection and data sources for variables hypothesized to associate with an* 68 *increased probability of severe clinical outcomes for an infection* 69

70 To characterize epidemic risk, defined as potential SARS-CoV-2 related morbidity and mortality,  
71 we first synthesized factors hypothesized to influence risk in SSA settings (**Table S2**). Early  
72 during the pandemic, evidence suggested that age was an important risk factor associated with  
73 morbidity and mortality associated with SARS-CoV-2 infection<sup>39</sup>, a pattern subsequently  
74 confirmed across settings<sup>2,9,40</sup>. Associations between SARS-CoV-2 mortality and comorbidities  
75 including hypertension, diabetes, and cardiovascular disease emerged early<sup>39</sup>; and have been  
76 observed across settings, with further growing evidence for associations with obesity<sup>9,41</sup>, severe  
77 asthma<sup>9</sup>, and respiratory effects of pollution<sup>42</sup>.

78  
79 Many possible sources of bias complicate interpretation of these associations<sup>43</sup>, and while they  
80 provide a useful baseline, inference is also likely to change as the pandemic advances. To  
81 reflect this, our analysis combines a number of high level variables likely to broadly encompass  
82 these putative risk factors (e.g., non-communicable disease (NCD) related mortality and health  
83 life expectancy) with more specific measures encompassed in evidence to date (e.g.,  
84 prevalence of diabetes, obesity, and respiratory illness such as Chronic Obstructive Pulmonary  
85 Disease (COPD)). We also include measures relating to infectious diseases, undernourishment,  
86 and anemia given their interaction and effects in determining health status in these settings<sup>44</sup>.

87  
88 Data on the identified indicators were sourced in May 2020 from the World Health Organization  
89 (WHO) Global Health Observatory (GHO) database (<https://www.who.int/data/gho>), World Bank  
90 (<https://data.worldbank.org/>), and other sources detailed in **Table S3**. National level  
91 demographic data (population size and age structure) was sourced from United Nations World  
92 Population Prospects (UNPOP)<sup>38</sup> and data on subnational variation in demography was  
93 sourced from WorldPop<sup>25</sup>. Household size data was defined by the mean number of individuals  
94 in a household with at least one person aged > 50 years, taken from the most recently available  
95 demographic health survey (DHS) data<sup>45</sup>. All country level data for all indicators can be found  
96 online at the [[SSA-SARS-CoV-2-tool](#)].

97  
98 Comparisons of national level estimates sourced from WHO and other sources are affected by  
99 variation within countries and variation in the uncertainty around estimates from different  
100 geographical areas. To assess potential differences in data quality between geographic areas  
101 we compared the year of most recent data for variables (**Figure S2**). The mean (range varied  
102 from 2014.624 to 2014.928 by region) and median year (2016 for all regions) of the most recent  
103 data varied little between regions. To account for uncertainty associated in the estimates  
104 available for a single variable, we also include multiple variables per category (e.g.,  
105 demographic and socio-economic factors, comorbidities, access to care) to avoid reliance on a  
106 single metric. This allows exploring variation between countries across a broad suite of  
107 variables likely to be indicative of the different dimensions of risk.

108  
109 Although including multiple variables that are likely to be correlated (see PCA methods below  
110 for further discussion) would bias inference of cumulative risk in a statistical framework, we do  
111 not attempt to quantitatively combine risk across variables for a country, nor project risk based  
112 on the variables included here. Rather, we characterize the magnitude of variation among  
113 countries for these variables (see **Figure 2** in the main text for a subset of the variables; **Figure**  
114 **3B** for bivariate risk maps following <sup>46</sup>) and then explore the range of outcomes that would be  
115 expected under scenarios where *IFR* increases with age at different rates (see **Figure 3** in the  
116 main text).

## 117 118 *2.2. Variable selection and data sources for variables hypothesized to modulate the rate of viral* 119 *spread*

120  
121 In addition to characterizing variation among factors likely to modulate burden, we also  
122 synthesize data sources relevant to the rate of viral spread, or pace, for the SARS-CoV-2  
123 pandemic in SSA. Factors hypothesized to modulate viral transmission and geographic spread  
124 include climatic factors (e.g., specific humidity), access to prevention measures (e.g.,  
125 handwashing), and human mobility (e.g., international and domestic travel). **Table S2** outlines  
126 the dimensions of risk selected and references the previous studies relevant to the selection of  
127 these factors.

128  
129 Climate data was sourced from the global, gridded ERA5 dataset <sup>47</sup> where model data is  
130 combined with global observation data (see **Section A7** for details).

131  
132 International flight data was obtained from a custom report from OAG Aviation Worldwide (UK)  
133 and included the departure location, airport of arrival, date of travel, and number of passenger  
134 seats for flights arriving to 113 international airports in SSA (see **Section A5**).

135  
136 As an estimate of connectivity within subregions of countries, the population weighted mean  
137 travel time to the nearest city with a population greater than 50,000 was determined; details are  
138 provided in **Section A6**. To obtain a set of measures that broadly represent connectivity within  
139 different countries in the region, friction surfaces from ref<sup>24</sup> were used to obtain estimates of the  
140 connectivity between different administrative level 2 units within each country. Details of this,  
141 alongside the metapopulation model framework used to simulate viral spread with variation in  
142 connectivity are in **Section A6**.

143  
144 **Figure 2** in the main text shows variation among SSA countries for four of the variables; **Figure**  
145 **S3** shows variation for all variables. **Figure 3** in the main text shows variation for a subset of the  
146 comorbidity and access to care indicators as a heatmap; **Figure S4** shows variation for all the  
147 variables (both also available online at the [\[SSA-SARS-CoV-2-tool\]](#)).

148

149 **Table S2**  
 150 **Hypothesized dimensions of risk and expected direction of effect on SARS-CoV-2**  
 151 **transmission or burden in sub-Saharan Africa (SSA) relative to higher latitude countries**

| Dimension of risk                                                | Factors hypothesized to <b>decrease</b> transmission or burden in sub-Saharan Africa relative to other geographic areas                                                                     | Factors hypothesized to <b>increase</b> transmission or burden in sub-Saharan Africa relative to other geographic areas                                                                                                                                                                                                                                                                           |
|------------------------------------------------------------------|---------------------------------------------------------------------------------------------------------------------------------------------------------------------------------------------|---------------------------------------------------------------------------------------------------------------------------------------------------------------------------------------------------------------------------------------------------------------------------------------------------------------------------------------------------------------------------------------------------|
| <i>(A) Demographic and socio-economic characteristics in SSA</i> | Younger populations, and thus a smaller proportion of individuals in the older age groups that experience the highest mortality <sup>2-4</sup>                                              | A larger proportion of urban populations living in dense settings, which may result in higher transmission <sup>48</sup> ; higher contact with older individuals as a result of multi-generation households <sup>14</sup>                                                                                                                                                                         |
| <i>(B) Comorbidities in SSA</i>                                  | Lower rates of some comorbidities that have been associated with risk of worse outcomes, e.g., obesity <sup>9,41</sup>                                                                      | Higher rates of NCDs such as hypertension or COPD <sup>39</sup> , which are associated with worse outcomes; and a potential role for as yet undescribed interactions e.g., with anemia, or high prevalence infectious diseases                                                                                                                                                                    |
| <i>(C) Climate in SSA</i>                                        | Warmer, wetter climates on average driving reduced transmission <sup>1,49</sup>                                                                                                             |                                                                                                                                                                                                                                                                                                                                                                                                   |
| <i>(D) Capacity to deploy prevention measures in SSA</i>         | Experience with previous outbreak response which may yield more rapid and nimble approaches to reducing transmission <sup>21,22</sup>                                                       | Lower access to handwashing <sup>50,51</sup> and other prevention options such as self-isolation <sup>52</sup> , increasing transmission<br><br>Subregions of countries with reduced governance infrastructure <sup>53</sup>                                                                                                                                                                      |
| <i>(E) Access to healthcare in SSA</i>                           |                                                                                                                                                                                             | Larger variation in access to and coverage of health systems <sup>54</sup> including fewer medical staff and facilities such as hospital beds <sup>14</sup> increasing burden<br><br>Increased vulnerability to disruption of routine health services (e.g., <sup>31</sup> )<br><br>Limited testing capacity <sup>55</sup> reducing the capacity to identify and interrupt chains of transmission |
| <i>(F) Human mobility and travel in SSA</i>                      | Fewer viral importations due to reduced frequency of international travel <sup>29,30</sup><br><br>Decreased rate of internal spread due to less connectivity within countries <sup>56</sup> |                                                                                                                                                                                                                                                                                                                                                                                                   |

153 **Table S3**  
 154 **Variables and data sources for indicators of SARS-CoV-2 epidemic risk in sub-Saharan**  
 155 **Africa**

| ID                                                                                       | Variable                                                                                                                                                                                                                                                          | Source                 | Hypothesized association(s) with SARS-CoV-2 outcomes                                                                            |
|------------------------------------------------------------------------------------------|-------------------------------------------------------------------------------------------------------------------------------------------------------------------------------------------------------------------------------------------------------------------|------------------------|---------------------------------------------------------------------------------------------------------------------------------|
| <i>(A) Demographic and socio-economic characteristics</i>                                |                                                                                                                                                                                                                                                                   |                        |                                                                                                                                 |
| A1                                                                                       | Human population size; Proportion of population over age 50 (%) from the UN Population Division UNPOP (2019 revision) estimates of population by single calendar year (2020), age, and country                                                                    | UN <sup>38</sup>       | Morbidity and mortality observed to increase with age (e.g. <sup>2-4</sup> )                                                    |
| A2                                                                                       | Subnational spatial variation in the distribution of the human population and age structure                                                                                                                                                                       | WorldPop               |                                                                                                                                 |
| A3                                                                                       | Household size: Mean household size for households with an individual over age 50                                                                                                                                                                                 | DHS                    | Proxy for social contact rate for the elderly population at higher risk for SARS-CoV-2 morbidity and mortality <sup>14</sup>    |
| A4                                                                                       | Proportion of households with an individual over age 50                                                                                                                                                                                                           | DHS                    |                                                                                                                                 |
| A5                                                                                       | Health life expectancy (HALE) at age 60 (years)                                                                                                                                                                                                                   | WHO                    | Proxy for baseline health status of elderly population                                                                          |
| A6                                                                                       | Proportion of population below the poverty line (%)                                                                                                                                                                                                               | World Bank             | More severe clinical outcomes associated with poverty; A proxy for access to advanced care <sup>57,58</sup>                     |
| A7                                                                                       | Proportion of the urban population living in crowded, low quality housing (defined as households lacking one or more of the following conditions: access to improved water, access to improved sanitation, sufficient living area, and durability of housing) (%) | World Bank             | Indicator of capacity for prevention (e.g., through handwashing); Transmission observed to increase with crowding <sup>48</sup> |
| A8                                                                                       | Gross domestic product (GDP) per capita                                                                                                                                                                                                                           | World Bank             | Used in PCA analysis (see below) as an indicator of socio-economic status at the national level                                 |
| A9                                                                                       | GINI index, a measure of inequality in the distribution of income                                                                                                                                                                                                 | World Bank             |                                                                                                                                 |
| <i>(B) Comorbidities: General and nutrition related non-communicable diseases (NCDs)</i> |                                                                                                                                                                                                                                                                   |                        |                                                                                                                                 |
| B1                                                                                       | NCDs overall mortality per 100 000 popn, age-standardized                                                                                                                                                                                                         | WHO                    | Indicator of NCD burden in population; Comorbidities increase probability of severe clinical outcomes                           |
| B2                                                                                       | Cardiovascular disease related mortality per age group (annual deaths attributable per 100,000 population)                                                                                                                                                        | GDB 2017 <sup>59</sup> |                                                                                                                                 |
| B3                                                                                       | Diabetes prevalence among ages 20-79 (%)                                                                                                                                                                                                                          | World Bank             | Increases probability of severe clinical outcomes                                                                               |
| B4                                                                                       | Diabetes related mortality per age group (annual deaths attributable per 100,000 population)                                                                                                                                                                      | GDB 2017 <sup>59</sup> |                                                                                                                                 |

156  
 157  
 158  
 159



160  
161

(Table S3 continued)

| ID                                                                                       | Variable                                                                                                                            | Source                 | Hypothesized association(s) with SARS-CoV-2 outcomes                                                               |
|------------------------------------------------------------------------------------------|-------------------------------------------------------------------------------------------------------------------------------------|------------------------|--------------------------------------------------------------------------------------------------------------------|
| <i>(B) Comorbidities: General and nutrition related non-communicable diseases (NCDs)</i> |                                                                                                                                     |                        |                                                                                                                    |
| B5                                                                                       | Raised glucose prevalence, age-standardized (%)                                                                                     | WHO                    | Indicator of metabolic disease risk; Metabolic disease increases probability of severe clinical outcomes           |
| B6                                                                                       | Raised blood pressure prevalence, age-standardized (%)                                                                              | WHO                    |                                                                                                                    |
| B7                                                                                       | Raised cholesterol prevalence, age-standardized (%)                                                                                 | WHO                    |                                                                                                                    |
| B8                                                                                       | Overweight prevalence among adults, age-standardized (%)                                                                            | WHO                    |                                                                                                                    |
| B9                                                                                       | Anemia prevalence among non-pregnant women (%)                                                                                      | WHO                    | Indicator of poor nutritional status; Poor nutritional status may increase probability of severe clinical outcomes |
| B10                                                                                      | Undernourishment prevalence (%)                                                                                                     | WHO                    |                                                                                                                    |
| <i>(B) Comorbidities: NCDs related to respiratory system and pollution</i>               |                                                                                                                                     |                        |                                                                                                                    |
| B11                                                                                      | Annual mean PM2.5 exposure in urban areas (ug/m3)                                                                                   | WHO                    | Exposure to air pollution increases mortality <sup>42</sup>                                                        |
| B12                                                                                      | Lung, tracheal, and esophageal cancer mortality per 100 000 popn, age-standardized                                                  | WHO                    | Indicator of prevalence and management of chronic disease and inflammation affecting the respiratory tract         |
| B13                                                                                      | Chronic respiratory diseases (excluding asthma) related mortality per age group (annual deaths attributable per 100,000 population) | GDB 2017 <sup>59</sup> |                                                                                                                    |
| B14                                                                                      | COPD mortality per 100 000 popn, age-standardized                                                                                   | WHO                    |                                                                                                                    |
| <i>(B) Comorbidities: Infectious diseases</i>                                            |                                                                                                                                     |                        |                                                                                                                    |
| B15                                                                                      | Respiratory infections mortality per 100 000 popn, age-standardized                                                                 | WHO                    | Indicator of prevalence and management of infectious disease affecting the respiratory tract                       |
| B16                                                                                      | TB incidence per 100 000 popn                                                                                                       | World Bank             | Indicator of susceptibility to respiratory infections and immune suppression                                       |
| B17                                                                                      | HIV prevalence among ages 15-49 (%)                                                                                                 | World Bank             | Indicator of immunosuppressed population                                                                           |
| <i>(C) Climate</i>                                                                       |                                                                                                                                     |                        |                                                                                                                    |
| C1                                                                                       | Seasonal change in specific humidity (in selected urban centers)                                                                    | ERA5 <sup>47</sup>     | Transmission rate of coronaviruses may decline with humidity                                                       |
| <i>(D) Capacity to deploy prevention measures</i>                                        |                                                                                                                                     |                        |                                                                                                                    |
| D1                                                                                       | Proportion of urban popn with basic handwashing facilities with water and soap at home (%)                                          | WHO                    | Handwashing observed to reduce infection rates for respiratory pathogens                                           |

|    |                                                                                               |                   |  |
|----|-----------------------------------------------------------------------------------------------|-------------------|--|
| D2 | Proportion of the population with access to a handwashing station with soap and water in 2019 | Ref <sup>60</sup> |  |
|----|-----------------------------------------------------------------------------------------------|-------------------|--|

162  
163

(Table S3 continued)

| ID                                                  | Variable                                                                                                                                 | Source            | Hypothesized association(s) with SARS-CoV-2 outcomes                                                           |
|-----------------------------------------------------|------------------------------------------------------------------------------------------------------------------------------------------|-------------------|----------------------------------------------------------------------------------------------------------------|
| <i>(D) Capacity to deploy prevention measures</i>   |                                                                                                                                          |                   |                                                                                                                |
| D3                                                  | Proportion of 1 year olds receiving full immunization coverage (%)                                                                       | WHO               | Proxy for coverage of routine health services                                                                  |
| D4                                                  | Reported number of completed tests reported for SARS-CoV-2 infection as of June 30, 2020                                                 | Africa CDC        | Indicator of surveillance capacity                                                                             |
| <i>(E) Access to healthcare in SSA</i>              |                                                                                                                                          |                   |                                                                                                                |
| E1                                                  | Proportion of children with pneumonia symptoms taken to a health facility (%)                                                            | WHO               | Proxy for access to medical care and care seeking                                                              |
| E2                                                  | Subnational spatial variation in the probability of seeking treatment for fever at public facilities                                     | Ref <sup>61</sup> |                                                                                                                |
| E3                                                  | Proportion of births attended by skilled staff (%)                                                                                       | World Bank        |                                                                                                                |
| E4                                                  | Nurses and midwives per 100 000 popn                                                                                                     | World Bank        | Indicators of treatment capacity                                                                               |
| E5                                                  | Physicians per 100 000 popn                                                                                                              | World Bank        |                                                                                                                |
| E6                                                  | Hospitals per 100 000 popn                                                                                                               | World Bank        |                                                                                                                |
| E7                                                  | Hospital beds 100 000 popn                                                                                                               | World Bank        |                                                                                                                |
| E8                                                  | Health expenditure per capita in (USD)                                                                                                   | WHO               | Proxy for health system resources; A significant predictor of intensive care unit (ICU) capacity <sup>62</sup> |
| E9                                                  | Proportion of health expenditures that are out-of-pocket (%)                                                                             | WHO               |                                                                                                                |
| <i>(F) Human mobility and travel: International</i> |                                                                                                                                          |                   |                                                                                                                |
| F1                                                  | Estimated number of international passengers arriving at SSA airports from January-April 2020                                            | OAG               | Indicator of the timing and number of introductions of SARS-CoV-2                                              |
| F2                                                  | Estimated number of international passengers arriving at SSA airports from January-April 2020 by SARS-CoV-2 status at departure location | OAG               |                                                                                                                |

164  
165

166 (Table S3 continued)

| ID                                             | Variable                                                                                                                                                                                            | Source            | Hypothesized association(s) with SARS-CoV-2 outcomes                               |
|------------------------------------------------|-----------------------------------------------------------------------------------------------------------------------------------------------------------------------------------------------------|-------------------|------------------------------------------------------------------------------------|
| <i>(F) Human mobility and travel: Domestic</i> |                                                                                                                                                                                                     |                   |                                                                                    |
| F3                                             | National population-weighted mean travel time to the nearest city (national mean of indicator F4)                                                                                                   | Ref <sup>63</sup> | Indicator of connectivity within countries; A proxy for the rate of human mobility |
| F4                                             | Population-weighted mean travel time to the nearest city (population > 50,000) for administrative level 2 units                                                                                     | Ref <sup>63</sup> |                                                                                    |
| F5                                             | Relative costs of travel between centroids of administrative level 2 derived from friction surfaces obtained by integrating data on travel infrastructure (Open Street Map, land cover types, etc). | Ref <sup>24</sup> |                                                                                    |

167

168 **Figure S2**  
169 **Year of most recent data available for variables compared between global regions**  
170 Dotted vertical line shows regional median; solid vertical line shows regional mean. Note that most data comes from  
171 2015-2019 (median = 2016, mean = 2014.624-2014.928).  
172

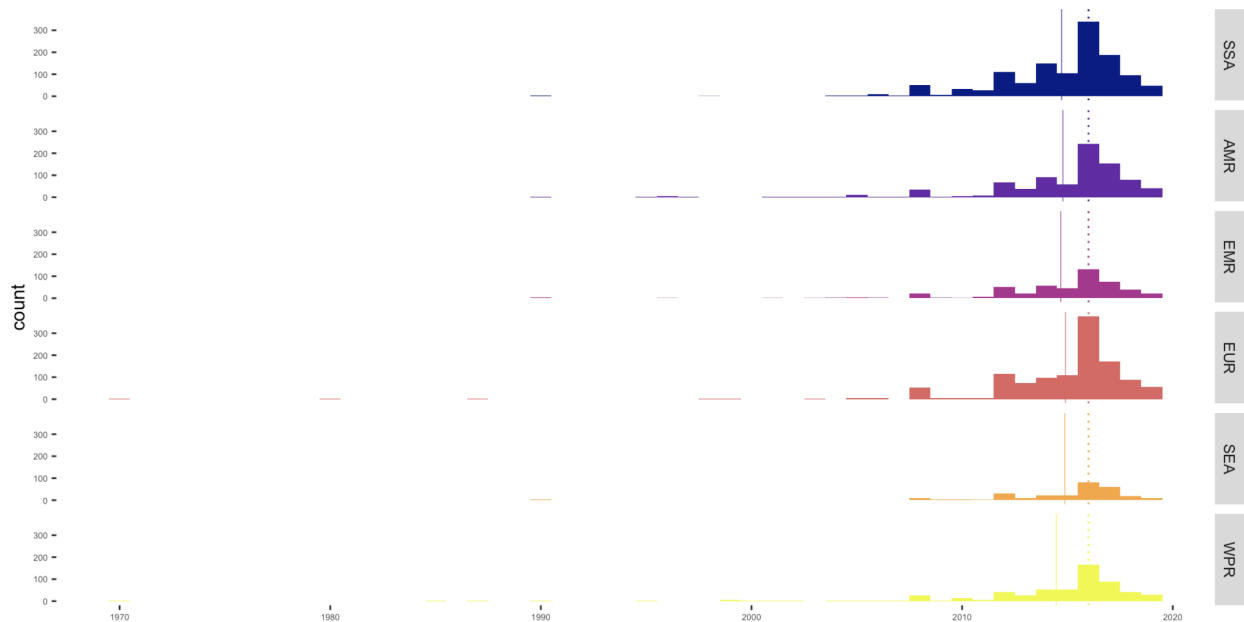

173  
174

REGION\_CODE

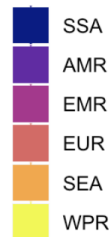

175

176 **Figure S3**

177 **Variation among sub-Saharan African countries in determinants of SARS-CoV-2 risk by**  
178 **variable**

179 A subset of variables is shown in Figure 2A-D in the main text, the remaining variables are  
180 shown in supplementary file “Figure S3 compiled.pdf” and available online: [[SSA-SARS-CoV-2-](#)  
181 [tool](#)]

182 **Figure S4**

183 **Variation among sub-Saharan African countries in determinants of SARS-CoV-2 mortality**  
 184 **risk by category**

185 A subset of variables is shown in Figure 3D-E in the main text, the remaining variables are shown and available  
 186 online: [\[SSA-SARS-CoV-2-tool\]](#)

187 **A:** Select national level indicators; estimates of increased comorbidity burden (e.g., higher prevalence of raised blood  
 188 pressure) shown with darker red for higher risk quartiles Countries missing data for an indicator (NA) are shown in  
 189 gray. For comparison between countries, estimates are age-standardized where applicable (see **Table S3** for details)

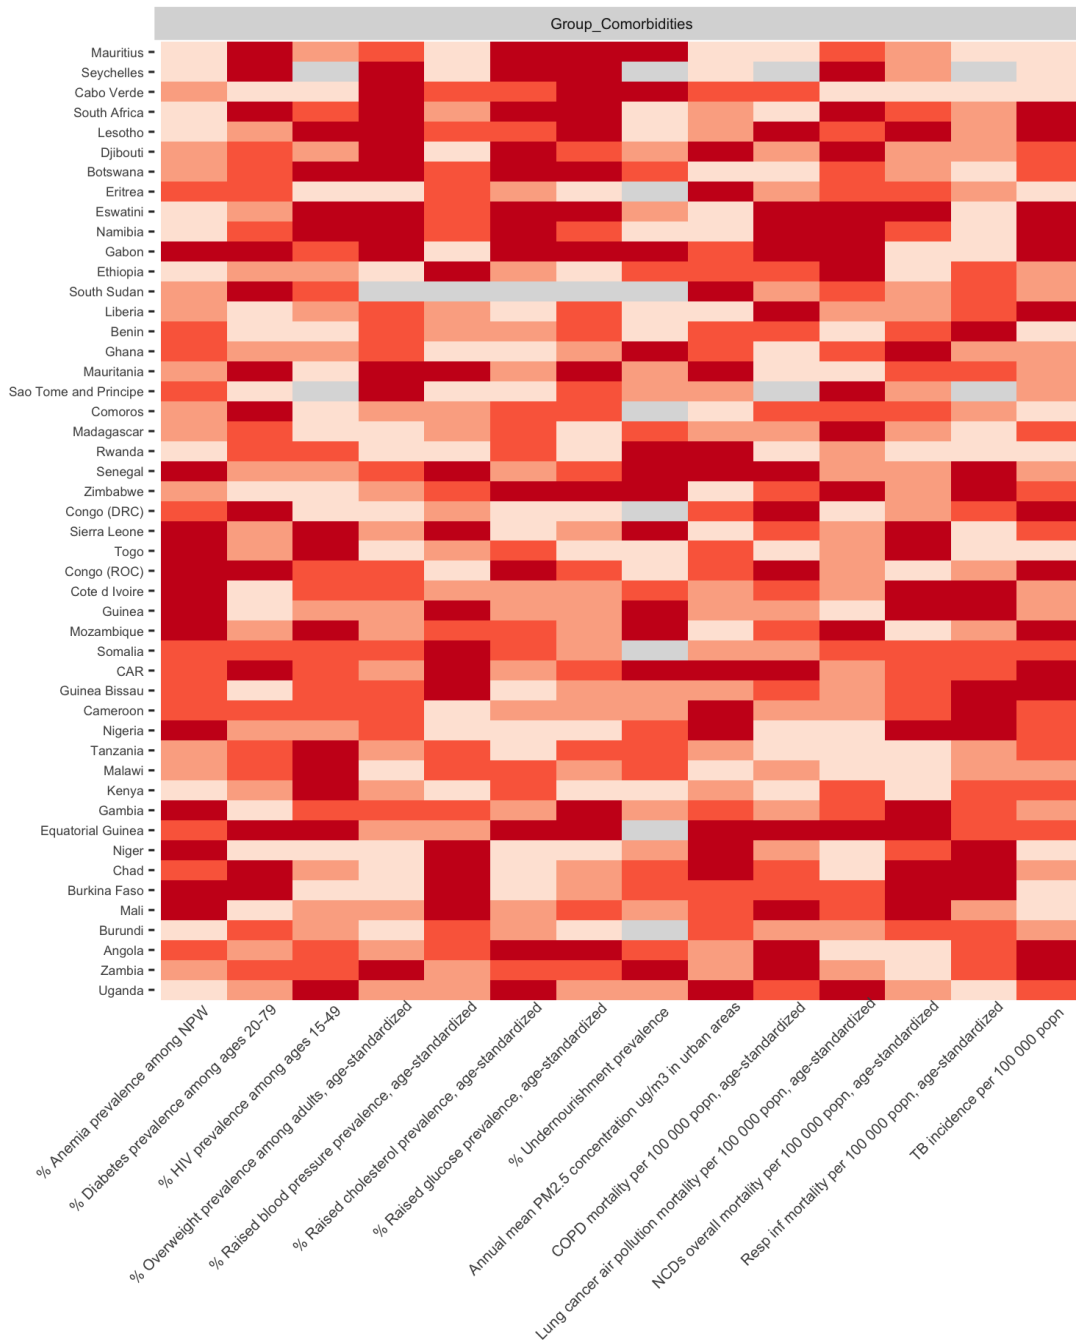

190

191

192 **B:** Select national level indicators; estimates of reduced access to care (e.g., fewer hospitals) shown with darker red  
 193 for higher risk quartiles Countries missing data for an indicator (NA) are shown in gray. For comparison between  
 194 countries, estimates are age-standardized where applicable (see **Table S3** for details)

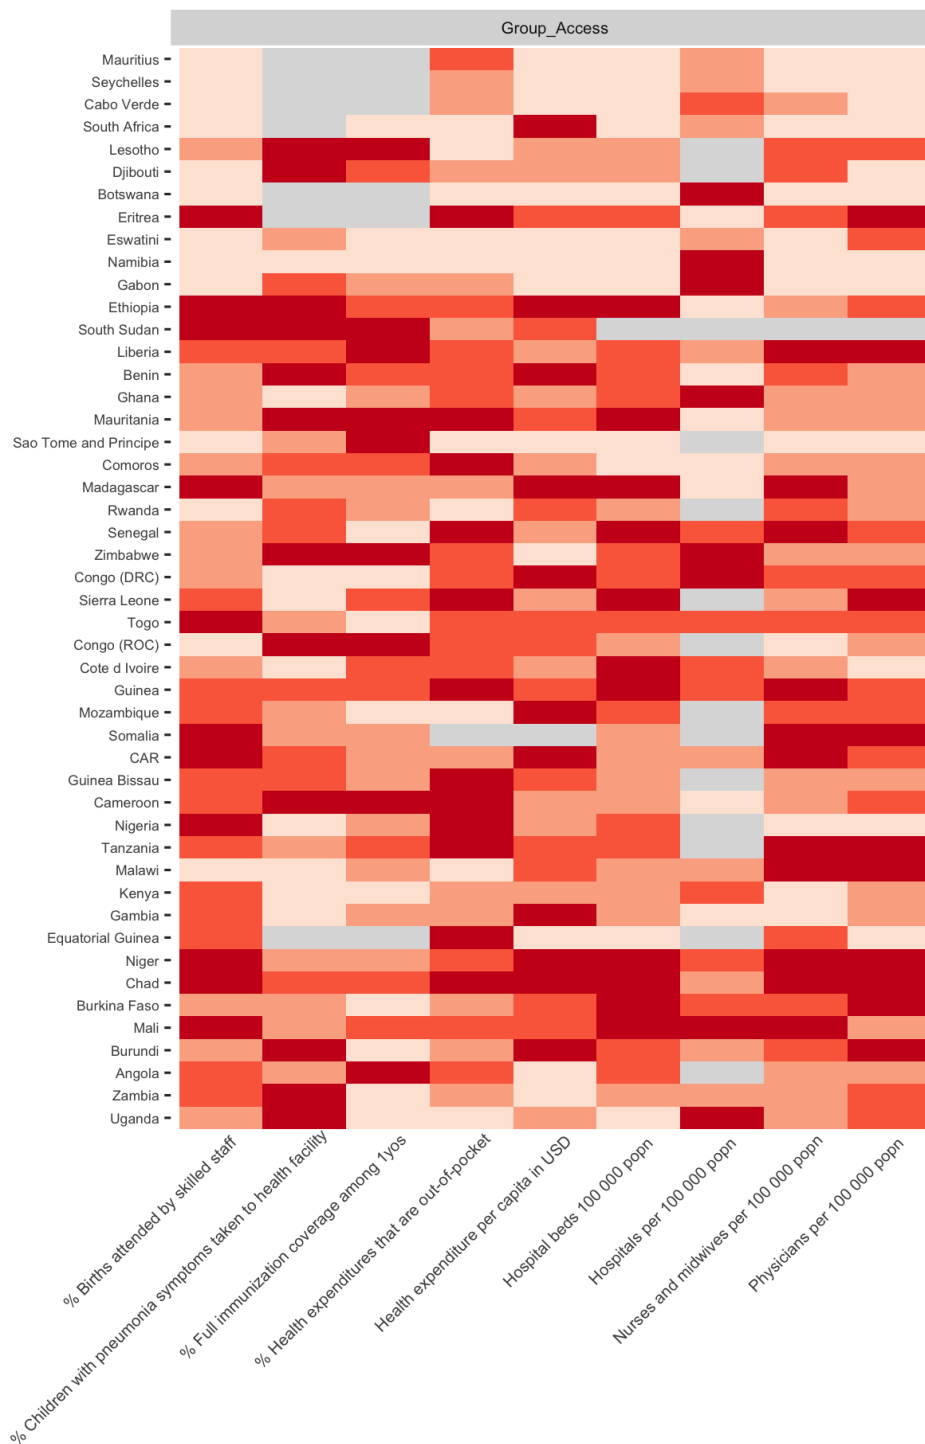

195

## 196 **A3 | Principal component analysis (PCA) of variables considered**

197

### 198 *3.1 Selection of data and variables*

199

200 The 29 national level variables from **Table S3** were selected for principal component analysis  
201 (PCA). We conducted further PCA on the subset of eight indicators related to access to  
202 healthcare (Category E) and the 14 national indicators variables related to comorbidities  
203 (Category B).

204

205 We excluded disaggregated sub-national spatial variation data (variables A2, C1, E2, and  
206 Category F), disaggregated or redundant variables derived from already included variables  
207 (variables A4 and D2), and disaggregated age-specific disease data from IHME global burden  
208 of disease study (variables B2, B4, and B13) from PCA analysis. COVID-19 tests per 100,000  
209 population (variable D4, **Table S1**), per capita gross domestic product (GDP) (Variable A8), and  
210 the GINI index of wealth inequality (Variable A9) were used to visualize patterns among sub-  
211 Saharan Africa countries.

212

213 In some cases, data were missing for a country for an indicator; in these cases, missing data  
214 were replaced with a zero value. This is a conservative approach as zero values (i.e., outside  
215 the range of typical values seen in the data) inflate the total variance in the data set and thus, if  
216 anything, deflate the percent of the variance explained by PCA. Therefore, this approach avoids  
217 mistakenly attributing predictive value to principal components due to incomplete data. See  
218 **Table S3** for data sources for each variable.

219

### 220 *3.2 Principal Component Analysis*

221

222 The PCA was conducted on each of the three subsets described above, using the scikitlearn  
223 library<sup>64</sup>. In order to avoid biasing the PCA due to large differences in magnitude and scale,  
224 each feature was centered around the mean, and scaled to unit variance prior to the analysis.  
225 Briefly, PCA applies a linear transformation to a set of  $n$  features to output a set of  $n$  orthogonal  
226 principal components which are uncorrelated and each explain a percentage of the total  
227 variance in the dataset<sup>65</sup>. A link to the code for this analysis is available online at the shiny app  
228 [[SSA-SARS-CoV-2-tool](#)].

229

230 The principal components were then analyzed for the percentage of variance explained, and  
231 compared to: (i) the number of COVID-19 tests per 100,000 population as of the end of June,  
232 2020 (**Table S1**), (ii) the per capita GDP, and (iii) the GINI index of wealth inequality. For the  
233 GINI index, estimates from 2008-2018 were available for 45 of the 48 countries (no GINI index  
234 data were available for Eritrea, Equatorial Guinea, and Somalia) (see **Data File 1** for the year  
235 for each country for each metric).

236

237

238

### 239 *3.3 PCA Results*



240  
241 The first two principal components from the analysis of 29 variables explain 32.6%, and 13.1%  
242 the total variance, respectively, in the dataset. Countries with higher numbers of completed  
243 SARS-CoV-2 tests reported tended to associate with an increase in principal component 1  
244 (Pearson correlation coefficient,  $r = 0.67$ ,  $p = 1.1e-7$ , **Figure S5A**). Similarly, high GDP  
245 countries seem to associate with an increase in principal component 1 (Pearson correlation  
246 coefficient,  $r = 0.80$ ,  $p = 6.02e-12$ ), **Figure S5B**). In contrast, countries with greater wealth  
247 inequality (as measured by the GINI index) are associated with a decrease in principal  
248 component 2 (Pearson correlation coefficient,  $r = -0.42$ ,  $p = .0042$ , **Figure S5C**). Despite these  
249 correlations, a relatively low percentage of variance is explained by each principal component:  
250 for the 29 variables, 13 of the 29 principal components are required to explain 90% of the  
251 variance (**Figure S5D**). When only the access to care subset of variables is considered, the first  
252 two principal components explain 50.7% and 19.1% of the variance, respectively, and five of  
253 eight principal components are required to explain 90% of the variance. When only the  
254 comorbidities subset is considered, the first two principal components explain 27.9% and 17.8%  
255 of the variance, respectively, and nine of 14 principal components are required to explain 90%  
256 of the variance (**Figure S4D**).

### 257 258 *3.4 PCA Discussion*

259  
260 These data suggest that inter-country variation in this dataset is not easily explained by a small  
261 number of variables. Moreover, though correlations exist between principal components and  
262 high-level explanatory variables (testing capacity, wealth), their magnitude is modest. These  
263 results highlight that dimensionality reduction is unlikely to be an effective analysis strategy for  
264 the variables considered in this study. Despite this overall finding, the PCA on the access to  
265 care subset of variables highlights that the variance in these variables is more easily explained  
266 by a small number of principal components, and hence may be more amenable to  
267 dimensionality reduction. This finding is unsurprising as, for example, the number of hospital  
268 beds per 100,000 population is likely to be directly related to the number of hospitals per  
269 100,000 population (indeed  $r = 0.60$ ,  $p = 5.7e-6$  for SSA). In contrast, for comorbidities, the  
270 relationship between different variables is less clear. Given the low percentages of variation  
271 captured by each principal component, and the high variability between different types of  
272 variables, these results motivate a holistic approach to using these data for assessing relative  
273 SARS-CoV-2 risk across SSA.

274  
275

276 **Figure S5**  
277 **Principal Component Analysis of all variables and category specific subsets of variables**  
278 **A:** Principal Component 1 and 2, countries colored by Log10 scaled tests per 100,000 population (as of June 30,  
279 2020)

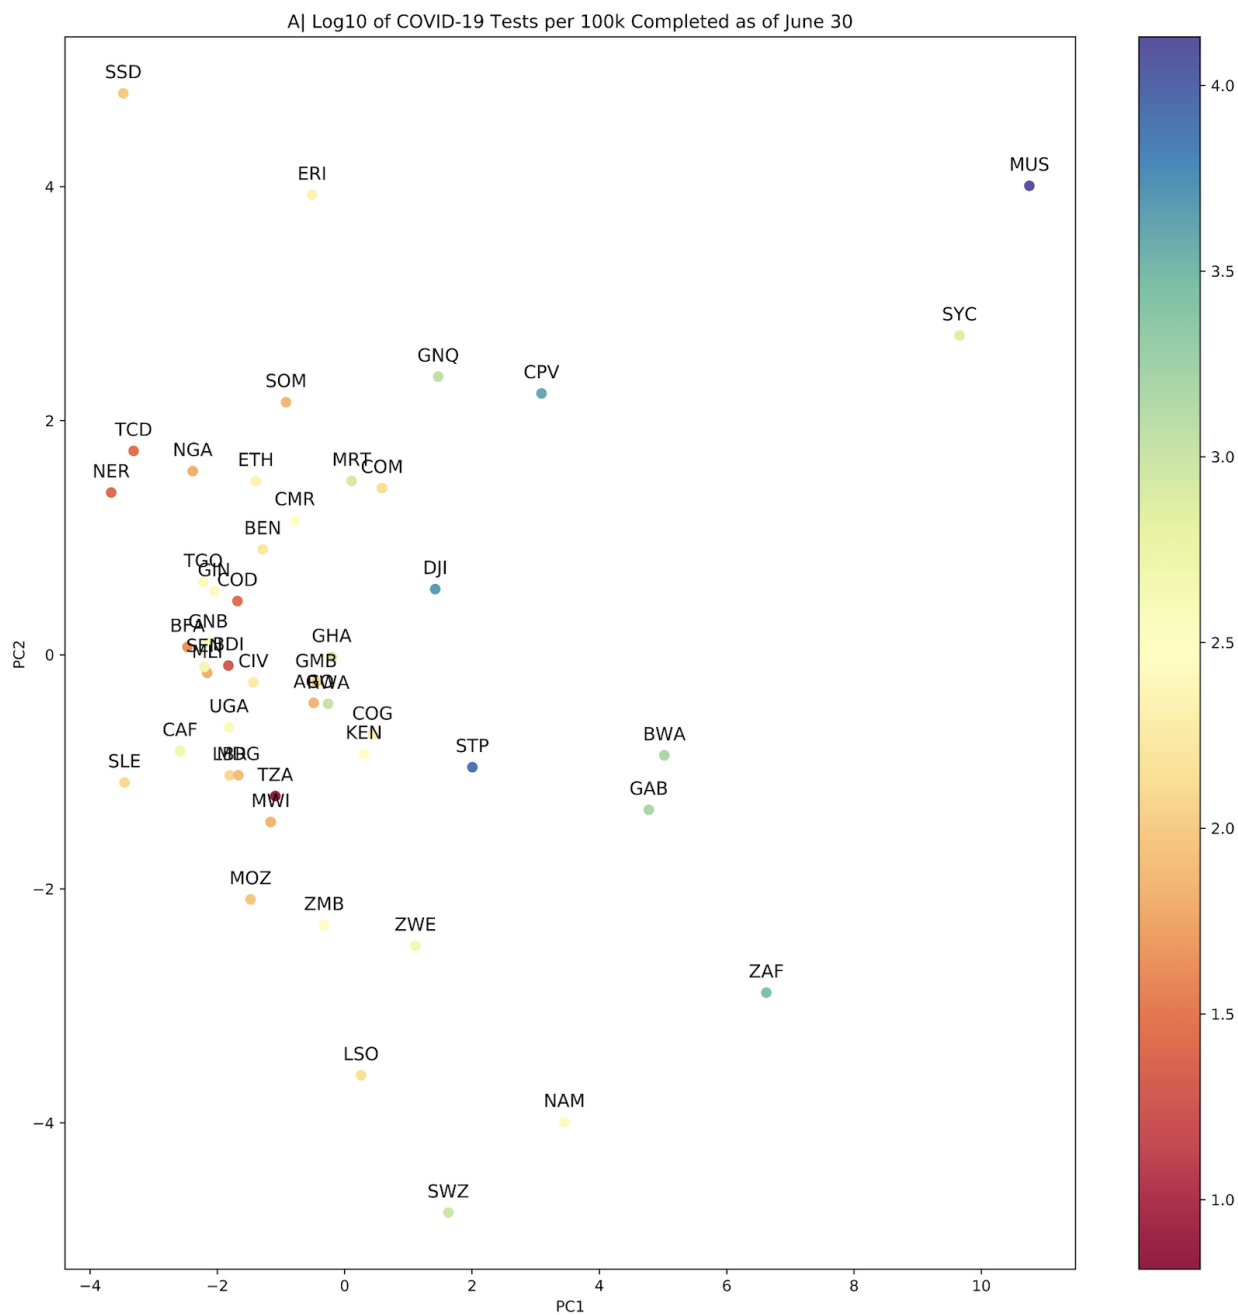

280

281

282 (Figure S5 continued)

283 **Figure S5**

284 **Principal Component Analysis of all variables and category specific subsets of variables**

285 **B:** Principal Component 1 and 2, countries colored by Log10 scaled GDP per capita

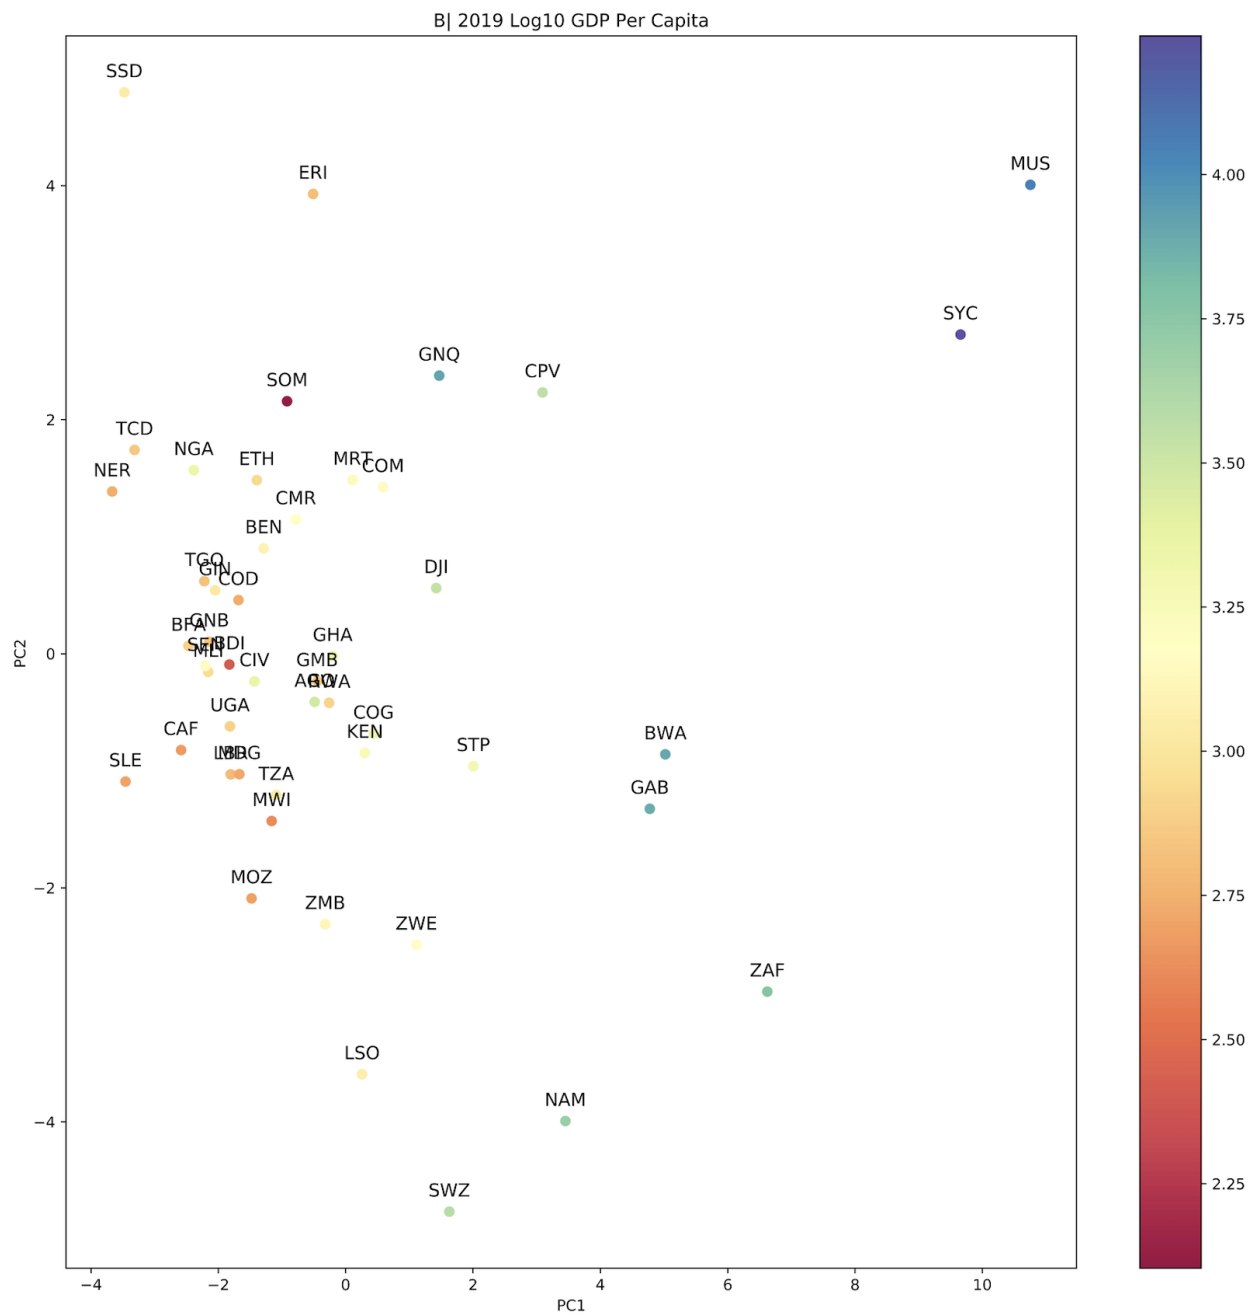

286  
287  
288

289 (Figure S5 continued)

290 **Figure S5**

291 **Principal Component Analysis of all variables and category specific subsets of variables**

292 **C: Principal Component 1 and 2, countries colored by the GINI index (a measure of wealth disparity)**

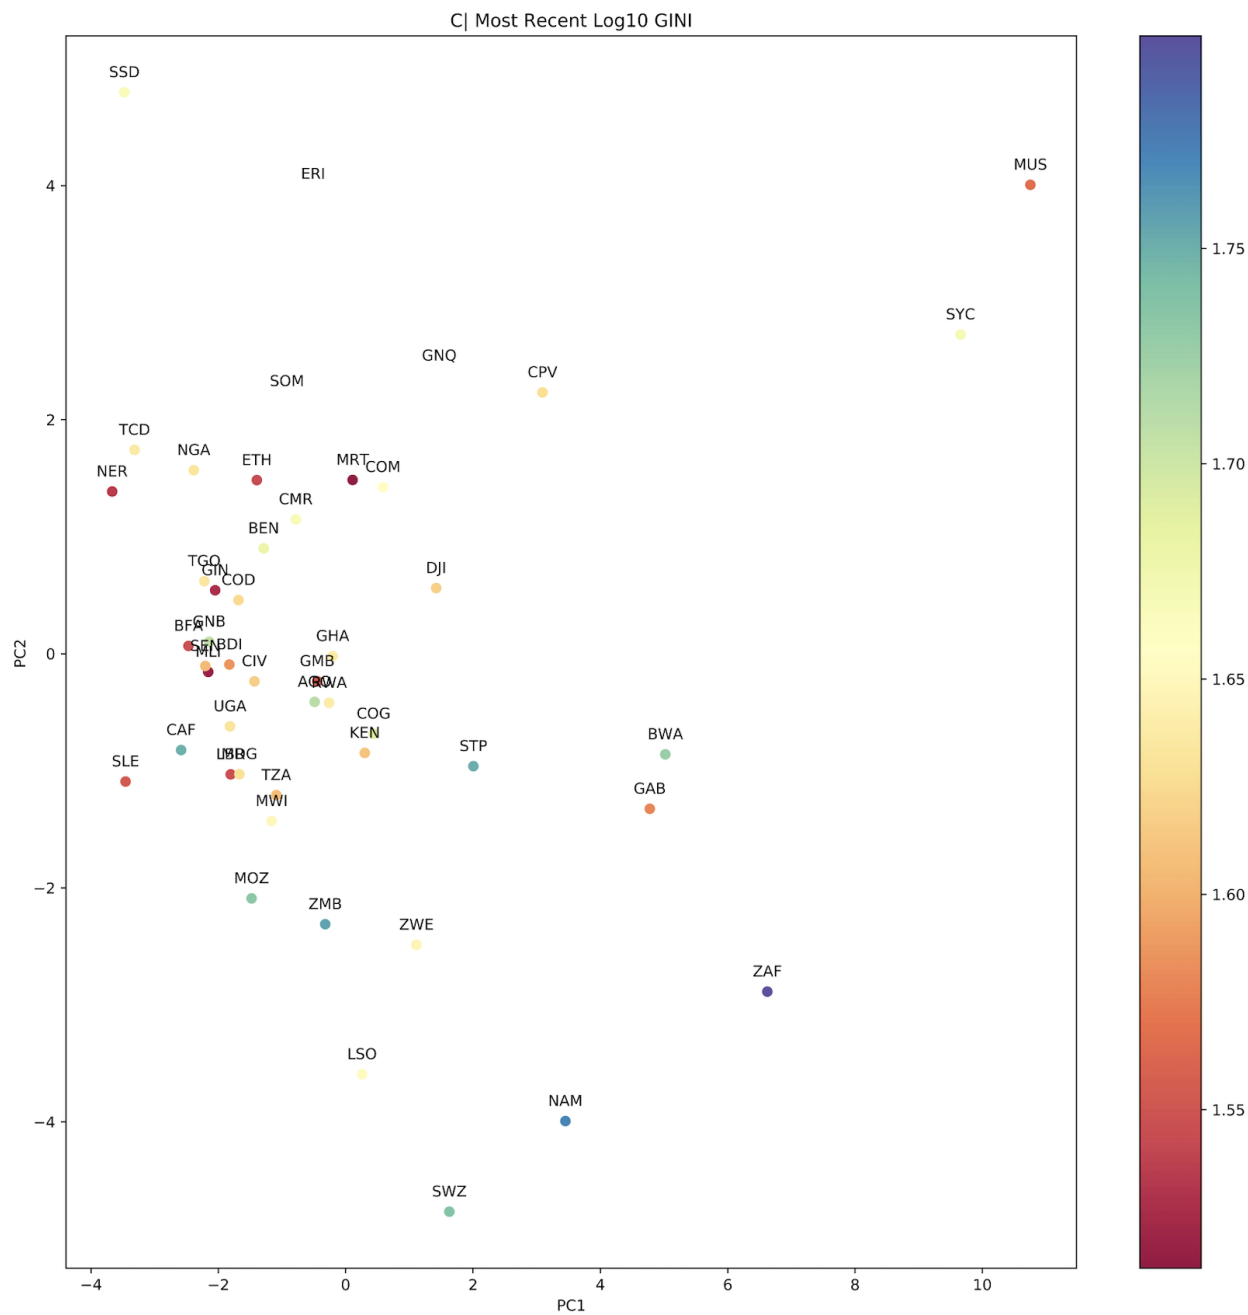

293  
294  
295

296 (Figure S5 continued)

## 297 **Figure S5**

### 298 **Principal Component Analysis of all variables and category specific subsets of variables**

299 **D:** Scree plot showing the cumulative proportion of variance explained by principal component for analysis done  
300 using all variables (blue, 29 variables), comorbidity indicators (green, 8 variables, Section B in **Table S3**), and  
301 access to care indicators (orange, 14 variables, Section E in **Table S3**)

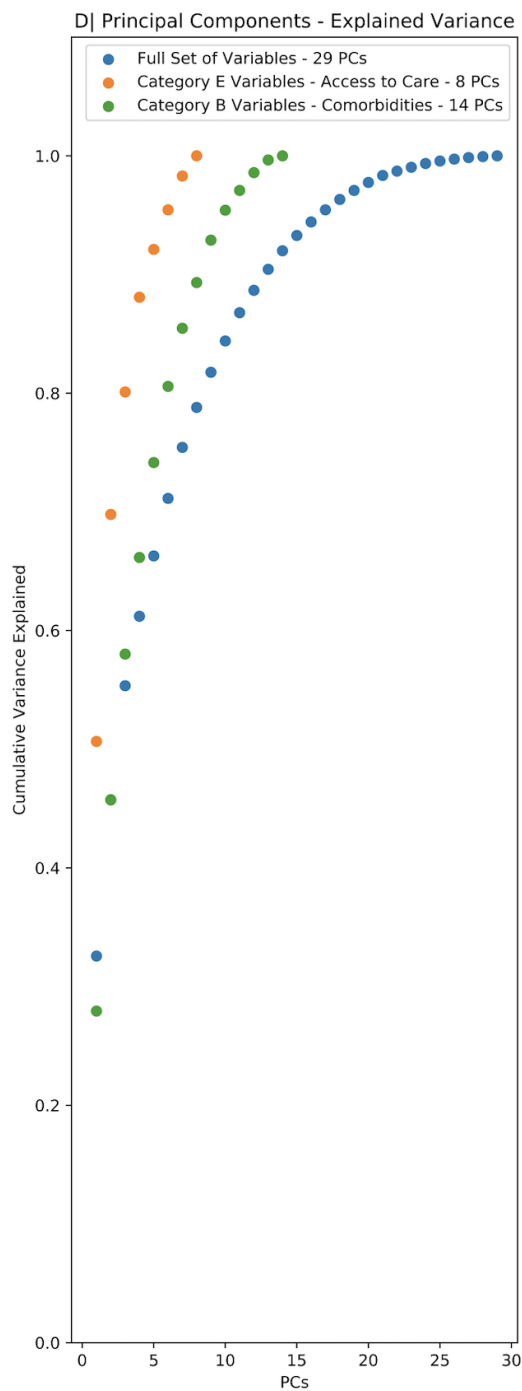

302

303

## 304 **A4 | Evaluating the burden emerging from the severity of infection** 305 **outcome**

306

### 307 *4.1 Data sourcing: Empirical estimates of IFR*

308

309 Estimates of the infection fatality ratio (*IFR*) that account for asymptomatic cases,  
310 underreporting, and delays in reporting are few, however, it is evident that *IFR* increases  
311 substantially with age<sup>66</sup>. We use age-stratified estimates of *IFR* from three studies (two  
312 published<sup>2,4</sup>, one preprint<sup>3</sup>) that accounted for these factors in their estimation (**Table S4**).

313

314 **Table S4: Sources of age-stratified IFR estimates**

| Study                            | Population                                                                                                                      | Methods                                                                                                                                                                                                             |
|----------------------------------|---------------------------------------------------------------------------------------------------------------------------------|---------------------------------------------------------------------------------------------------------------------------------------------------------------------------------------------------------------------|
| Salje et al. 2020 <sup>2</sup>   | Deaths and hospitalizations due to COVID-19 in French public and private hospitals across the country between 13 March - 11 May | Combined data from France with data from Diamond Princess Cruise ship to estimate age-stratified IFR, case severity, and hospitalization probabilities accounting for asymptomatic cases and underascertainment.    |
| Verity et al. 2020 <sup>4</sup>  | Deaths due to COVID-19 in Hubei province, China                                                                                 | Combined data from Hubei with data from PCR testing of repatriated citizens under quarantine to estimate age-stratified IFR accounting for asymptomatic cases and underascertainment.                               |
| Rinaldi et al. 2020 <sup>3</sup> | Deaths due to COVID-19 reported in Lombardia, Italy                                                                             | Analyzed deaths in the Lombardia region, one of the hardest hit regions in Italy, and used seroprevalence surveys of the region to estimate that 30% of the population was infected to estimate age-stratified IFR. |

315

316 To apply these estimates to other age-stratified data with different bin ranges and generate  
317 continuous predictions of *IFR* with age, we fit the relationship between the midpoint of the age  
318 bracket and the *IFR* estimate using a generalized additive model (GAM) using the 'mgcv'  
319 package<sup>67</sup> in R version 4.0.2<sup>68</sup>. We use a beta distribution as the link function for IFR estimates  
320 (data distributed on [0, 1]). For the upper age bracket (80+ years), we take the upper range to  
321 be 100 years and the midpoint to be 90.

322

323 We assume a given level of cumulative infection (here 20% in each age class, i.e., a constant  
324 rate of infection among age classes) and then apply *IFRs* by age to the population structure of  
325 each country to generate estimates of burden. Age structure estimates were taken from the  
326 UNPOP (see **Table S3**) country level estimates of population in 1 year age groups (0 - 100  
327 years of age) to generate estimates of burden.

328

329

330

331 *4.2 Data sourcing: Comorbidities over age from IHME*

332  
333 Applying these *IFR* estimates to the demographic structure of SSA countries provides a  
334 baseline expectation for mortality, but depends on the assumption that mortality patterns in sub-  
335 Saharan Africa will be similar to those from where the *IFR* estimates were sourced (France,  
336 China, and Italy). Comorbidities have been shown to be an important determinant of the severity  
337 of infection outcomes (i.e., *IFR*); to assess the relative risk of comorbidities across age in SSA,  
338 estimates of comorbidity severity by age (in terms of annual deaths attributable) were obtained  
339 from the Institute for Health Metrics and Evaluation (IHME) Global Burden of Disease (GBD)  
340 study in 2017<sup>69</sup>. Data were accessed through the GBD results tool for cardiovascular disease,  
341 chronic respiratory disease (not including asthma), and diabetes, reflecting three categories of  
342 comorbidity with demonstrated associations with risk (**Table S2**). We make the assumption that  
343 higher mortality rates due to these NCDs, especially among younger age groups, is indicative of  
344 increased severity and lesser access to sufficient care for these diseases - suggesting an  
345 elevated risk for their interaction with SARS-CoV-2 as comorbidities. While there are significant  
346 uncertainties in these data, they provide the best estimates of age specific risks and have been  
347 used previously to estimate populations at risk<sup>18</sup>.

348  
349 The comorbidity by age curves for SSA countries were compared to those for the three  
350 countries from which SARS-CoV-2 *IFR* by age estimates were sourced. Attributable mortality  
351 due to all three NCD categories is higher at age 50 in all 48 SSA countries when compared to  
352 estimates from France and Italy and for 42 of 48 SSA countries when compared to China  
353 (**Figure S5**).

354  
355 Given the potential for populations in SSA to experience a differing burden of SARS-CoV-2 due  
356 to their increased severity of comorbidities in younger age groups, we explore the effects of  
357 shifting *IFRs* estimated by the GAM of *IFR* estimates from France, Italy, and China younger by  
358 2, 5, and 10 years (**Figure 3** in main text).

359  
360

361 **Figure S6**

362 **Comorbidity burden by age in sub-Saharan Africa**

363 Estimated mortality per age group for sub-Saharan African countries (gray lines) compared to China, France, and  
364 Italy (the countries from which estimates of SARS-CoV-2 infection fatality ratios (*IFRs*) by age are available) for three  
365 NCD categories (cardiovascular diseases, chronic respiratory diseases excluding asthma, and diabetes).

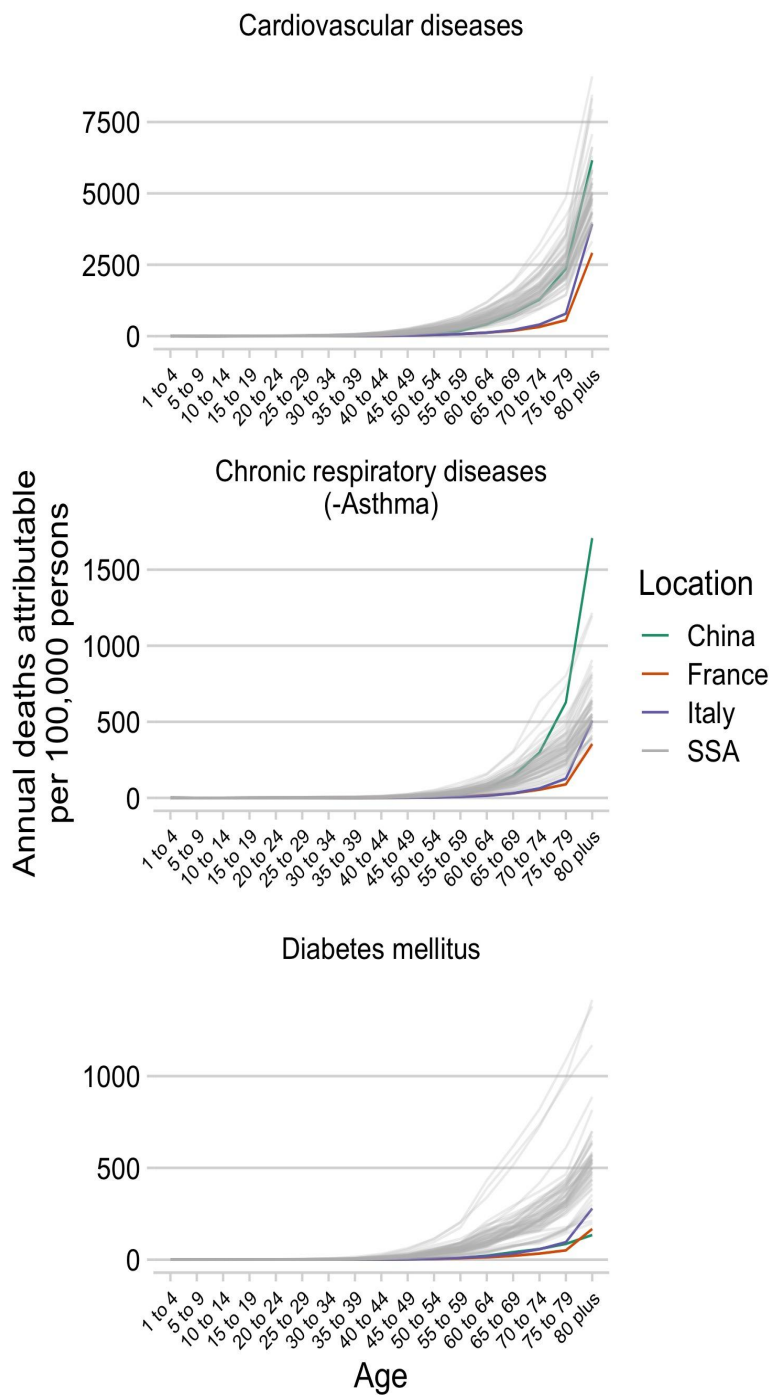



367

## 368 **A5 | International Air Travel to SSA**

369

370 The number of passenger seats on flights arriving to international airports were grouped by  
371 country and month for January 2020 to April 2020 (**Table S5**) - the months when the  
372 introduction of SARS-CoV-2 to SSA countries was likely to have first occurred. The first  
373 confirmed case reported from a SSA country, per the Johns Hopkins Coronavirus Research  
374 Center was in Nigeria on February 28, 2020. By March 31, 2020, 43 of 48 SSA countries had  
375 reported SARS-CoV-2 infections and international travel was largely restricted by April. Lesotho  
376 was the last SSA country to report a confirmed SARS-CoV-2 infection (on May 13, 2020);  
377 however, given difficulties in surveillance, the first reported detections were likely delayed  
378 relative to the first importations of the virus.

379

380 The probability of importation of the virus is defined by the number of travelers from each source  
381 location each date and the probability that a traveler from that source location on that date was  
382 infectious. Due to limitations in surveillance, especially early in the SARS-CoV-2 pandemic,  
383 empirical data on infection rates among travelers is largely lacking. To account for differences in  
384 the status of the SARS-CoV-2 pandemic across source locations, and thus differences in the  
385 importation risk for travelers from those locations, we coarsely stratified travelers arriving each  
386 day into four categories based on the status of their source countries:

387

- 388 i. Travelers from countries with zero reported cases (i.e., although undetected  
389 transmission was possibly occurring, SARS-CoV had not yet been confirmed in the  
390 source country by that date)
- 391 ii. Those traveling from countries with more than one reported case (i.e., SARS-CoV-2 had  
392 been confirmed to be present in that source country by that date),
- 393 iii. Those traveling from countries with more than 100 reported cases (indicating community  
394 transmission was likely beginning), and
- 395 iv. Those traveling from countries with more than 1000 reported cases (indicating  
396 widespread transmission)

397

398 For determining reported case counts at source locations for travelers, no cases were reported  
399 outside of China until January 13, 2020 (the date of the first reported case in Thailand). Over  
400 January 13 to January 21, cases were then reported in Japan, South Korea, Taiwan, Hong  
401 Kong, and the United States (<https://covid19.who.int/>). Subsequently, counts per country were  
402 tabulated daily by the Johns Hopkins Coronavirus Resource Center <sup>70</sup> beginning January 22  
403 (<https://coronavirus.jhu.edu/map.html>); we use that data from January 22 onwards and the  
404 WHO reports prior to January 22.

405

406 The number of travelers within each category arriving per month is shown in **Table S5**. This  
407 approach makes the conservative assumption that the probability a traveler is infected reflects  
408 the general countrywide infection rate of the source country at the time of travel (i.e., travelers  
409 are not more likely to be exposed than non-travelers in that source location) and does not  
410 account for complex travel itineraries (i.e., a traveler from a high risk source location transiting

411 through a low risk source location would be grouped with other travelers from the low risk  
412 source location). Consequently, the risk for viral importation is likely systematically  
413 underestimated. However, as the relative risk for viral importation will still scale with the number  
414 of travelers, comparisons among SSA countries can be informative (e.g., SSA countries with  
415 more travelers from countries with confirmed SARS-CoV-2 transmission are at higher risk for  
416 viral importation).

417  
418

## 419 **Table S5**

### 420 **Arrivals to SSA airports by the number of passenger seats and status of the SARS-CoV-2** 421 **pandemic at the origin at the time of travel**

422  
423 (attached as a csv file: "Table S5 International Airtravel to SSA.csv")

424  
425

#### Data Fields:

426  
427

- 428 1. country: Name of country
- 429 2. n\_airports: Number of airports with flight data
- 430 3. month: January, February, March, April 2020; or total for all 4 months
- 431 4. total\_n\_seats: Total number of passenger seats on arriving aircraft
- 432 5. From source with cases > 0: Number of passengers arriving from source locations with 1 or more reported  
433 SARS-CoV-2 infection by the date of travel
- 434 6. From source with cases > 100: Number of passengers arriving from source locations more than 100  
435 reported SARS-CoV-2 infection by the date of travel
- 436 7. From source with cases > 1000: Number of passengers arriving from source locations with more than 1000  
437 reported SARS-CoV-2 infection by the date of travel

438

## 439 **A6 | Subnational connectivity among countries in sub-Saharan Africa**

440

### 441 *6.1. Indicators of subnational connectivity*

442

443 To allow comparison of the relative connectivity across countries, we use the friction surface  
444 estimates provided by Weiss et al.<sup>24</sup> as a relative measure of the rate of human movement  
445 between subregions of a country. For connectivity within subregions of a country (e.g., transport  
446 from a city to the rural periphery), we use as an indicator the population weighted mean travel  
447 time to the nearest urban center (i.e., population density > 1,500 per square kilometer or a  
448 density of built-up areas > 50% coincident with population > 50,000) within administrative-2  
449 units<sup>63</sup>. For some countries, estimates at administrative-2 units were unavailable (Comoros,  
450 Cape Verde, Lesotho, Mauritius, Mayotte, and Seychelles); estimates at the administrative-1  
451 unit level were used for these cases (these were all island nations, with the exception of  
452 Lesotho).

453

### 454 *6.2. Metapopulation model methods*

455

456 Once SARS-CoV-2 has been introduced into a country, the degree of spread of the infection  
457 within the country will be governed by subnational mobility: the pathogen is more likely to be  
458 introduced into a location where individuals arrive more frequently than one where incoming  
459 travellers are less frequent. Large-scale consistent measures of mobility remain rare. However,  
460 recently, estimates of accessibility have been produced at a global scale<sup>24</sup>. Although this is  
461 unlikely to perfectly reflect mobility within countries, especially as interventions and travel  
462 restrictions are put in place, it provides a starting point for evaluating the role of human mobility  
463 in shaping the outbreak pace across SSA. We use the inverse of a measure of the cost of travel  
464 between the centroids of administrative level 2 spatial units to describe mobility between  
465 locations (estimated by applying the costDistance function in the *gdistance* package in R to the  
466 friction surfaces supplied in ref<sup>24</sup>). With this, we develop a metapopulation model for each  
467 country to develop an overview of the possible range of trajectories of unchecked spread of  
468 SARS-CoV-2.

469

470 We assume that the pathogen first arrives into each country in the administrative 2 level unit  
471 with the largest population (e.g., the largest city) and the population in each administrative 2  
472 level (of size  $N_j$ ) is entirely susceptible at the time of arrival. We then track spread within and  
473 between each of the administrative 2 level units of each country. Within each administrative 2  
474 level unit, dynamics are governed by a discrete time Susceptible (S), Infected (I) and Recovered  
475 (R) model with a time-step of ~ 1 week, which is broadly consistent with the serial interval of  
476 SARS-CoV-2. Within the spatial unit indexed  $j$ , with total size  $N_j$ , dynamics follow:

477

478

$$I_{j,t+1} = \beta I_{j,t} S_{j,t} / N_j + \iota_{j,t}$$

479

$$S_{j,t+1} = S_{j,t} - I_{j,t+1} + b$$

480

481 where  $\beta$  captures the magnitude of transmission over the course of one serial interval (and is set  
482 to 2.5 to approximately represent the  $R_0$  of SARS-CoV-2); the exponent  $\alpha = 0.97$  is used to  
483 capture the effects of discretization<sup>71</sup>,  $\iota_{j,t}$  captures the introduction of new infections into site  $j$  at  
484 time  $t$ , and  $b$  reflects the introduction of new susceptible individuals resulting from the birth rate,  
485 set to reflect the most recent estimates for that country from the World Bank Data Bank  
486 (<https://data.worldbank.org/indicator/SP.DYN.CBRT.IN>).

487  
488 We make the simplifying assumption that mobility linking locations  $i$  and  $j$ , denoted  $c_{i,j}$ , scales  
489 with the inverse of the cost of travel between sites  $i$  and  $j$  evaluated according to the friction  
490 surface provided in<sup>24</sup>. The introduction of an infected individual into location  $j$  is then defined by  
491 a draw from a Bernoulli distribution following:

492 
$$\iota_{j,t} \sim \text{Bern}(1 - \exp(-\sum_1^L c_{i,j} I_{i,t}/N_i))$$

493 where  $L$  is the total number of administrative 2 units in that country, and the rate of introduction  
494 is the product of connectivity between the focal location and each other location multiplied by  
495 the proportion of population in each other location that is infected.

496  
497 Some countries show rapid spread between administrative units within the country (e.g., a  
498 country with parameters that broadly reflect those available for Malawi, **Figure S7**), while in  
499 others (e.g., reflecting Madagascar), connectivity may be so low that the outbreak may be over  
500 in the administrative unit of the largest size (where it was introduced) before introductions  
501 successfully reach other poorly connected administrative units. The result is a hump shaped  
502 relationship between the fraction of the population that is infected after 5 years and the time to  
503 the first local extinction of the pathogen (**Figure S7**, right top). In countries with lower  
504 connectivity (e.g., that might resemble Madagascar), local outbreaks can go extinct rapidly  
505 before travelling very far; in other countries (e.g., that might resemble Gabon), the pathogen  
506 goes extinct rapidly because it travels rapidly and rapidly depletes susceptible individuals  
507 everywhere.

508  
509 The impact of the pattern of travel between centroids is echoed by the pattern of travel within  
510 administrative districts: countries where the pathogen does not reach a large fraction of the  
511 administrative 2 units within the country in 5 years are also those where within administrative  
512 unit travel is low (**Figure S7**, right bottom).

513  
514 These simulations provide a window onto qualitative patterns expected for subnational spread  
515 of the pandemic virus, but there is no clear way of calibrating the absolute rate of travel between  
516 regions of relevance for SARS-CoV-2. Thus, the time-scales of these simulations should be  
517 considered in relative, rather than absolute terms. Variation in lockdown effectiveness, or other  
518 changes in mobility for a given country may also compromise relative comparisons. Variability in  
519 case reporting complicates clarifying this (**Figure S8**).

## 520 **Figure S7**

### 521 **Pace of the outbreak**

522 Each grey line on the left hand panels indicates the total infected across all administrative units in a metapopulation  
523 simulation with parameters reflecting the country indicated by the plot title, assuming interventions are constant.  
524 Increases after the first peak indicate the pathogen reaching a new administrative 2 unit. In Malawi-like settings  
525 (higher connectivity), more administrative units are reached rapidly, whereas in Madagascar-like settings (lower  
526 connectivity), a lower proportion of the administrative units are reached by a given time, as fewer introductions occur  
527 before the outbreak has burned out in the administrative 2 unit with the largest population. More generally, rapid  
528 disappearance of the outbreak (top right hand plot, y axis shows time to extinction) could either indicate rapid spread  
529 with a high proportion of the countries' population reached (top right hand plot, x axis) or slow spread, with many  
530 administrative units unreached, and therefore remaining susceptible. The pattern of between-administrative unit travel  
531 also echoes travel time within administrative units (lower panel, right hand side, x axis indicates fraction of  
532 administrative units unreached, and upper panel indicates travel time in hours to the nearest city of 50,000 or more  
533 people).

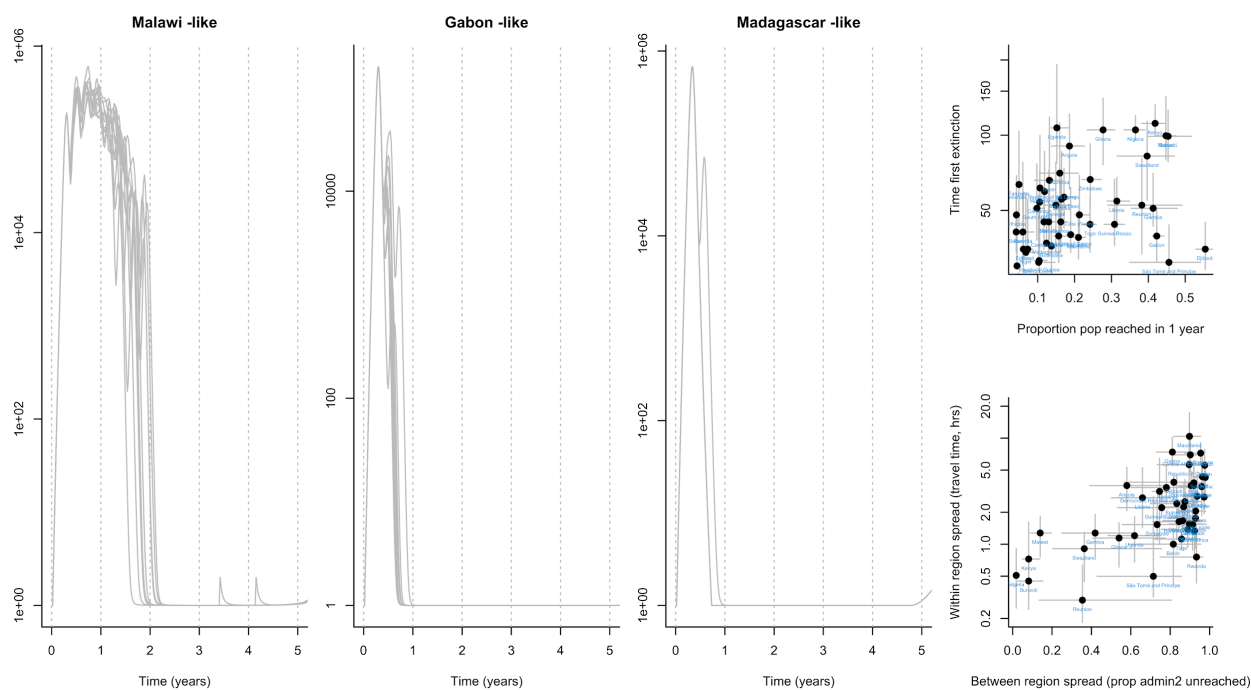

534  
535  
536  
537  
538  
539  
540  
541

542 **Figure S8**

543 **Cases and testing vs. the pace of the outbreak**

544 The total number of confirmed cases reported by country (x axis, left, as reported for June 28th  
545 by Africa CDC) and the test positivity (x axis, right, defined as the total number of confirmed  
546 cases divided by the number of tests run, as reported by Africa CDC, likewise) show no  
547 significant relationship with the proportion of the population estimated to be infected after one  
548 year using the metapopulation simulation described in A6 (respectively,  $\rho = -0.04, p > 0.5, df =$   
549  $41$  and  $\rho = 0.02, p > 0.5, df = 41$ ). All else equal, a positive relationship is expected; however,  
550 both uncertainty in case numbers, and uncertainty associated with the simulation might both  
551 drive the absence of a signal.

552

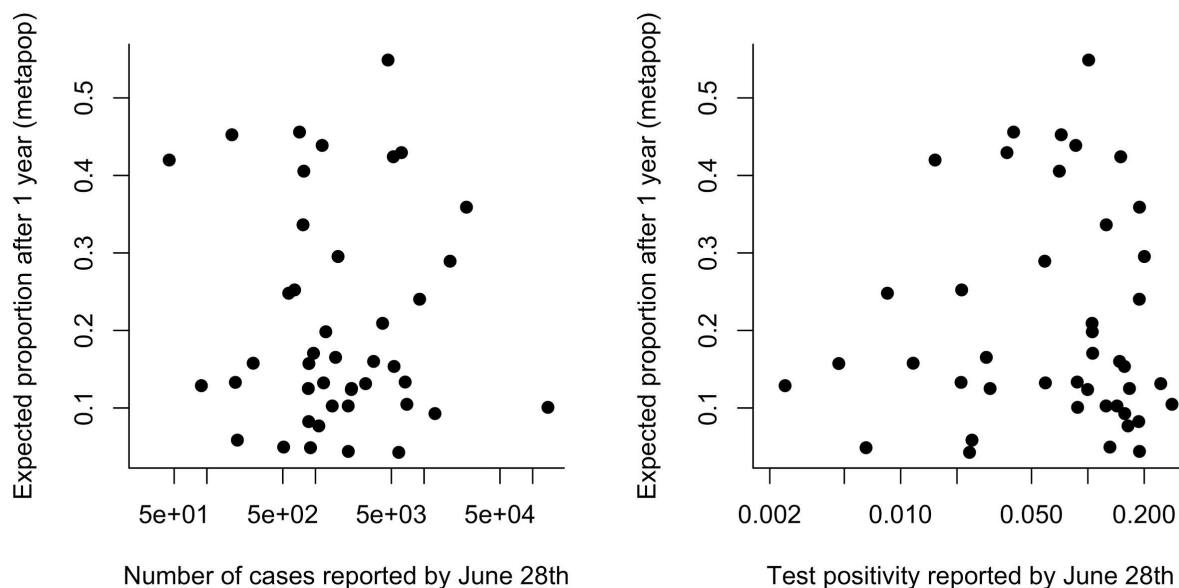

553

## 554 **A7 | Modeling epidemic trajectories in scenarios where transmission** 555 **rate depends on climate**

556

### 557 *7.1 Climate data sourcing: Variation in humidity in SSA*

558

559 Specific humidity data for selected urban centers comes from ERA5 using an average  
560 climatology (1981-2017)<sup>47</sup>; we do not consider year-to-year climate variations. Selected cities ( $n$   
561 = 58) were chosen to represent the major urban areas in SSA. The largest city in each SSA  
562 country was included as well as any additional cities that were among the 25 largest cities or  
563 busiest airports in SSA.

564

### 565 *7.2 Methods for climate driven modelling of SARS-CoV-2*

566

567 We use a climate-driven SIRS (Susceptible-Infected-Recovered-Susceptible) model to estimate  
568 epidemic trajectories (i.e., the time of peak incidence) in different cities in 2020, assuming no  
569 control measures are in place<sup>23,72</sup>. The model is given by:

570

$$571 \quad \frac{dS}{dt} = \frac{N - S - L}{L} - \frac{\beta(t)IS}{N}$$
$$572 \quad \frac{dI}{dt} = \frac{\beta(t)IS}{N} - \frac{I}{D}$$

573

574 where  $S$  is the susceptible population,  $I$  is the infected population and  $N$  is the total population.  
575  $D$  is the mean infectious period, set at 5 days following ref<sup>23,49</sup>. To investigate the maximum  
576 possible climate effect, we use parameters from the most climate-dependent scenario in ref<sup>23</sup>,  
577 based on betacoronavirus HKU1. In this scenario  $L$ , the duration of immunity, is found to be  
578 66.25 weeks (i.e., greater than 1 year and such that waning immunity does not affect timing of  
579 the epidemic peak).

580

581 Transmission is governed by  $\beta(t)$  which is related to the basic reproduction number  $R_0$  by  
582  $R_0(t) = \beta(t)D$ . The basic reproduction number varies based on the climate and is related to  
583 specific humidity according to the equation:

584

$$585 \quad R_0 = \exp(a * q(t) + \log(R_{0max} - R_{0min})) + R_{0min}$$

586

587 where  $q(t)$  is specific humidity<sup>47</sup> and  $a$  is set at -227.5 based on estimated HKU1 parameters<sup>23</sup>.  
588  $R_{0max}$  and  $R_{0min}$  are 2.5 and 1.5 respectively. We assume the same time of introduction for all  
589 cities, set at March 1<sup>st</sup>, 2020 (consistent with the first reported cases in SSA, **Figure S1D**)

590

591

592 **References**

- 593 1. Mecenas, P., Bastos, R., Vallinoto, A. & Normando, D. Effects of temperature and humidity  
594 on the spread of COVID-19: A systematic review. doi:10.1101/2020.04.14.20064923.
- 595 2. Salje, H. *et al.* Estimating the burden of SARS-CoV-2 in France. *Science* (2020)  
596 doi:10.1126/science.abc3517.
- 597 3. Rinaldi, G. & Paradisi, M. An empirical estimate of the infection fatality rate of COVID-19  
598 from the first Italian outbreak. doi:10.1101/2020.04.18.20070912.
- 599 4. Verity, R. *et al.* Estimates of the severity of coronavirus disease 2019: a model-based  
600 analysis. *Lancet Infect. Dis.* **20**, 669–677 (2020).
- 601 5. Africa CDC - COVID-19 Daily Updates. *Africa CDC* <https://africacdc.org/covid-19/>.
- 602 6. Mortality Analyses. *Johns Hopkins Coronavirus Resource Center*  
603 <https://coronavirus.jhu.edu/data/mortality>.
- 604 7. Skrip, L. A. *et al.* Seeding COVID-19 across sub-Saharan Africa: an analysis of reported  
605 importation events across 40 countries. doi:10.1101/2020.04.01.20050203.
- 606 8. Deng, X. *et al.* Case fatality risk of novel coronavirus diseases 2019 in China.  
607 doi:10.1101/2020.03.04.20031005.
- 608 9. Collaborative, T. O. *et al.* OpenSAFELY: factors associated with COVID-19-related hospital  
609 death in the linked electronic health records of 17 million adult NHS patients.  
610 doi:10.1101/2020.05.06.20092999.
- 611 10. COVID-19 significantly impacts health services for noncommunicable diseases.  
612 [https://www.who.int/news-room/detail/01-06-2020-covid-19-significantly-impacts-health-](https://www.who.int/news-room/detail/01-06-2020-covid-19-significantly-impacts-health-services-for-noncommunicable-diseases)  
613 [services-for-noncommunicable-diseases](https://www.who.int/news-room/detail/01-06-2020-covid-19-significantly-impacts-health-services-for-noncommunicable-diseases).
- 614 11. Maintaining essential health services: operational guidance for the COVID-19 context.  
615 [https://www.who.int/publications/i/item/covid-19-operational-guidance-for-maintaining-](https://www.who.int/publications/i/item/covid-19-operational-guidance-for-maintaining-essential-health-services-during-an-outbreak)  
616 [essential-health-services-during-an-outbreak](https://www.who.int/publications/i/item/covid-19-operational-guidance-for-maintaining-essential-health-services-during-an-outbreak).
- 617 12. Santoli, J. M. Effects of the COVID-19 Pandemic on Routine Pediatric Vaccine Ordering



- 618 and Administration — United States, 2020. *MMWR Morb. Mortal. Wkly. Rep.* **69**, (2020).
- 619 13. Robertson, T. *et al.* Early estimates of the indirect effects of the COVID-19 pandemic on  
620 maternal and child mortality in low-income and middle-income countries: a modelling study.  
621 *Lancet Glob Health* **8**, e901–e908 (2020).
- 622 14. Walker, P. G. T. *et al.* The impact of COVID-19 and strategies for mitigation and  
623 suppression in low- and middle-income countries. *Science* (2020)  
624 doi:10.1126/science.abc0035.
- 625 15. Pei, S., Kandula, S. & Shaman, J. Differential Effects of Intervention Timing on COVID-19  
626 Spread in the United States. *medRxiv* (2020) doi:10.1101/2020.05.15.20103655.
- 627 16. Lai, S. *et al.* Assessing the effect of global travel and contact reductions to mitigate the  
628 COVID-19 pandemic and resurgence. doi:10.1101/2020.06.17.20133843.
- 629 17. Nepomuceno, M. R. *et al.* Besides population age structure, health and other demographic  
630 factors can contribute to understanding the COVID-19 burden. *Proceedings of the National*  
631 *Academy of Sciences of the United States of America* vol. 117 13881–13883 (2020).
- 632 18. Clark, A. *et al.* Global, regional, and national estimates of the population at increased risk of  
633 severe COVID-19 due to underlying health conditions in 2020: a modelling study. *Lancet*  
634 *Glob Health* (2020) doi:10.1016/S2214-109X(20)30264-3.
- 635 19. Ghisolfi, S. *et al.* Predicted COVID-19 fatality rates based on age, sex, comorbidities, and  
636 health system capacity. doi:10.1101/2020.06.05.20123489.
- 637 20. [No title]. [https://www.imperial.ac.uk/media/imperial-college/medicine/mrc-gida/2020-05-12-](https://www.imperial.ac.uk/media/imperial-college/medicine/mrc-gida/2020-05-12-COVID19-Report-22.pdf)  
638 [COVID19-Report-22.pdf](https://www.imperial.ac.uk/media/imperial-college/medicine/mrc-gida/2020-05-12-COVID19-Report-22.pdf).
- 639 21. Kapata, N. *et al.* Is Africa prepared for tackling the COVID-19 (SARS-CoV-2) epidemic.  
640 Lessons from past outbreaks, ongoing pan-African public health efforts, and implications for  
641 the future. *International journal of infectious diseases: IJID: official publication of the*  
642 *International Society for Infectious Diseases* vol. 93 233–236 (2020).
- 643 22. Nachega, J. B. *et al.* From Easing Lockdowns to Scaling-Up Community-Based COVID-19

- 644 Screening, Testing, and Contact Tracing in Africa - Shared Approaches, Innovations, and  
645 Challenges to Minimize Morbidity and Mortality. *Clin. Infect. Dis.* (2020)  
646 doi:10.1093/cid/ciaa695.
- 647 23. Baker, R. E., Yang, W., Vecchi, G. A., Metcalf, C. J. E. & Grenfell, B. T. Susceptible supply  
648 limits the role of climate in the early SARS-CoV-2 pandemic. *Science* (2020)  
649 doi:10.1126/science.abc2535.
- 650 24. Weiss, D. J. *et al.* A global map of travel time to cities to assess inequalities in accessibility  
651 in 2015. *Nature* **553**, 333–336 (2018).
- 652 25. Tatem, A. J. WorldPop, open data for spatial demography. *Scientific Data* vol. 4 (2017).
- 653 26. [No title]. [https://washdata.org/sites/default/files/documents/reports/2019-05/JMP-2018-](https://washdata.org/sites/default/files/documents/reports/2019-05/JMP-2018-core-questions-for-household-surveys.pdf)  
654 [core-questions-for-household-surveys.pdf](https://washdata.org/sites/default/files/documents/reports/2019-05/JMP-2018-core-questions-for-household-surveys.pdf).
- 655 27. Korevaar, H. M. *et al.* Quantifying the impact of US state non-pharmaceutical interventions  
656 on COVID-19 transmission. doi:10.1101/2020.06.30.20142877.
- 657 28. Mikkelsen, L. *et al.* A global assessment of civil registration and vital statistics systems:  
658 monitoring data quality and progress. *Lancet* **386**, 1395–1406 (2015).
- 659 29. Gilbert, M. *et al.* Preparedness and vulnerability of African countries against importations of  
660 COVID-19: a modelling study. *Lancet* **395**, 871–877 (2020).
- 661 30. Haider, N. *et al.* Passengers' destinations from China: low risk of Novel Coronavirus (2019-  
662 nCoV) transmission into Africa and South America. *Epidemiol. Infect.* **148**, e41 (2020).
- 663 31. Takahashi, S. *et al.* Reduced vaccination and the risk of measles and other childhood  
664 infections post-Ebola. *Science* vol. 347 1240–1242 (2015).
- 665 32. Cash, R. & Patel, V. Has COVID-19 subverted global health? *Lancet* **395**, 1687–1688  
666 (2020).
- 667 33. Adams, J. G. & Walls, R. M. Supporting the Health Care Workforce During the COVID-19  
668 Global Epidemic. *JAMA* (2020) doi:10.1001/jama.2020.3972.
- 669 34. Kilmarx, P. H. *et al.* Ebola virus disease in health care workers--Sierra Leone, 2014.

- 670 *MMWR Morb. Mortal. Wkly. Rep.* **63**, 1168–1171 (2014).
- 671 35. Covid 19 Mauritius Dashboard. *Google Data Studio*
- 672 [http://datastudio.google.com/reporting/510dbd29-25cd-4fbb-a47a-](http://datastudio.google.com/reporting/510dbd29-25cd-4fbb-a47a-68effeda6cf5/page/0z6JB?feature=opengraph)
- 673 [68effeda6cf5/page/0z6JB?feature=opengraph](http://datastudio.google.com/reporting/510dbd29-25cd-4fbb-a47a-68effeda6cf5/page/0z6JB?feature=opengraph).
- 674 36. Rwanda: WHO Coronavirus Disease (COVID-19) Dashboard. <https://covid19.who.int>.
- 675 37. Mina, M. J. *et al.* A Global Immunological Observatory to meet a time of pandemics. *Elife* **9**,
- 676 (2020).
- 677 38. World Population Prospects - Population Division - United Nations.
- 678 <https://population.un.org/wpp/Download/Standard/Population/>.
- 679 39. The Novel Coronavirus Pneumonia Emergency Response Epidemiology Team. The
- 680 Epidemiological Characteristics of an Outbreak of 2019 Novel Coronavirus Diseases
- 681 (COVID-19) — China, 2020. *CCDCW* **2**, 113–122 (2020).
- 682 40. Team, C. C.-19 R. *et al.* Severe Outcomes Among Patients with Coronavirus Disease 2019
- 683 (COVID-19) — United States, February 12–March 16, 2020. *MMWR. Morbidity and*
- 684 *Mortality Weekly Report* vol. 69 343–346 (2020).
- 685 41. Simonnet, A. *et al.* High prevalence of obesity in severe acute respiratory syndrome
- 686 coronavirus-2 (SARS-CoV-2) requiring invasive mechanical ventilation. *Obesity* (2020)
- 687 doi:10.1002/oby.22831.
- 688 42. Conticini, E., Frediani, B. & Caro, D. Can atmospheric pollution be considered a co-factor in
- 689 extremely high level of SARS-CoV-2 lethality in Northern Italy? *Environ. Pollut.* **261**, 114465
- 690 (2020).
- 691 43. Griffith, G. *et al.* Collider bias undermines our understanding of COVID-19 disease risk and
- 692 severity. doi:10.1101/2020.05.04.20090506.
- 693 44. Shankar, A. H. Nutritional Modulation of Malaria Morbidity and Mortality. *The Journal of*
- 694 *Infectious Diseases* vol. 182 S37–S53 (2000).
- 695 45. The DHS Program - Quality information to plan, monitor and improve population, health,

- 696 and nutrition programs. <https://dhsprogram.com>.
- 697 46. Chin, T. *et al.* U.S. county-level characteristics to inform equitable COVID-19 response.  
698 *medRxiv* (2020) doi:10.1101/2020.04.08.20058248.
- 699 47. Hersbach, H. *et al.* The ERA5 global reanalysis. *Q.J.R. Meteorol. Soc.* **64**, 29 (2020).
- 700 48. Report 23 - State-level tracking of COVID-19 in the United States. *Imperial College London*  
701 [http://www.imperial.ac.uk/medicine/departments/school-public-health/infectious-disease-](http://www.imperial.ac.uk/medicine/departments/school-public-health/infectious-disease-epidemiology/mrc-global-infectious-disease-analysis/covid-19/report-23-united-states/)  
702 [epidemiology/mrc-global-infectious-disease-analysis/covid-19/report-23-united-states/](http://www.imperial.ac.uk/medicine/departments/school-public-health/infectious-disease-epidemiology/mrc-global-infectious-disease-analysis/covid-19/report-23-united-states/).
- 703 49. Kissler, S. M., Tedijanto, C., Goldstein, E., Grad, Y. H. & Lipsitch, M. Projecting the  
704 transmission dynamics of SARS-CoV-2 through the postpandemic period. *Science* **368**,  
705 860–868 (2020).
- 706 50. Jiwani, S. S. & Antiporta, D. A. Inequalities in access to water and soap matter for the  
707 COVID-19 response in sub-Saharan Africa. *Int. J. Equity Health* **19**, 82 (2020).
- 708 51. Stoler, J., Jepson, W. E. & Wutich, A. Beyond handwashing: Water insecurity undermines  
709 COVID-19 response in developing areas. *J. Glob. Health* **10**, 010355 (2020).
- 710 52. Makoni, M. Keeping COVID-19 at bay in Africa. *Lancet Respir Med* **8**, 553–554 (2020).
- 711 53. Tatem, A. J. *et al.* Ranking of elimination feasibility between malaria-endemic countries.  
712 *Lancet* **376**, 1579–1591 (2010).
- 713 54. Metcalf, C. J. E. *et al.* Transport networks and inequities in vaccination: remoteness shapes  
714 measles vaccine coverage and prospects for elimination across Africa. *Epidemiol. Infect.*  
715 **143**, 1457–1466 (2015).
- 716 55. Adepoju, P. Africa’s struggle with inadequate COVID-19 testing. *The Lancet Microbe* vol. 1  
717 e12 (2020).
- 718 56. Pindolia, D. K. *et al.* The demographics of human and malaria movement and migration  
719 patterns in East Africa. *Malar. J.* **12**, 397 (2013).
- 720 57. Qiu, Y., Chen, X. & Shi, W. Impacts of social and economic factors on the transmission of  
721 coronavirus disease (COVID-19) in China. doi:10.1101/2020.03.13.20035238.

- 722 58. Li, H. *et al.* Age-Dependent Risks of Incidence and Mortality of COVID-19 in Hubei  
723 Province and Other Parts of China. *Front. Med.* **7**, 190 (2020).
- 724 59. Global Burden of Disease Study 2017 (GBD 2017) Population Estimates 1950-2017 |  
725 GHDx. [http://ghdx.healthdata.org/record/ihme-data/gbd-2017-population-estimates-1950-](http://ghdx.healthdata.org/record/ihme-data/gbd-2017-population-estimates-1950-2017)  
726 2017.
- 727 60. Brauer, M., Zhao, J. T., Bennitt, F. B. & Stanaway, J. D. Global access to handwashing:  
728 implications for COVID-19 control in low-income countries.  
729 doi:10.1101/2020.04.07.20057117.
- 730 61. Alegana, V. A. *et al.* National and sub-national variation in patterns of febrile case  
731 management in sub-Saharan Africa. *Nat. Commun.* **9**, 4994 (2018).
- 732 62. Murthy, S., Leligdowicz, A. & Adhikari, N. K. J. Intensive care unit capacity in low-income  
733 countries: a systematic review. *PLoS One* **10**, e0116949 (2015).
- 734 63. Linard, C., Gilbert, M., Snow, R. W., Noor, A. M. & Tatem, A. J. Population distribution,  
735 settlement patterns and accessibility across Africa in 2010. *PLoS One* **7**, e31743 (2012).
- 736 64. [No title]. <https://dl.acm.org/doi/10.5555/1953048.2078195>.
- 737 65. Jolliffe, I. T. & Cadima, J. Principal component analysis: a review and recent developments.  
738 *Philos. Trans. A Math. Phys. Eng. Sci.* **374**, 20150202 (2016).
- 739 66. Meyerowitz-Katz, G. & Merone, L. A systematic review and meta-analysis of published  
740 research data on COVID-19 infection-fatality rates. doi:10.1101/2020.05.03.20089854.
- 741 67. Wood, S. N. *Generalized Additive Models: An Introduction with R, Second Edition.* (CRC  
742 Press, 2017).
- 743 68. R: The R Project for Statistical Computing. <https://www.R-project.org/>.
- 744 69. Global Burden of Disease Study 2017 (GBD 2017) Population Estimates 1950-2017 |  
745 GHDx. [http://ghdx.healthdata.org/record/ihme-data/gbd-2017-population-estimates-1950-](http://ghdx.healthdata.org/record/ihme-data/gbd-2017-population-estimates-1950-2017)  
746 2017.
- 747 70. Dong, E., Du, H. & Gardner, L. An interactive web-based dashboard to track COVID-19 in

- 748 real time. *Lancet Infect. Dis.* **20**, 533–534 (2020).
- 749 71. Bjornstad, O. N., Finkenstadt, B. F. & Grenfell, B. T. Dynamics of Measles Epidemics:  
750 Estimating Scaling of Transmission Rates Using a Time Series SIR Model. *Ecological*  
751 *Monographs* vol. 72 169 (2002).
- 752 72. Shaman, J., Pitzer, V. E., Viboud, C., Grenfell, B. T. & Lipsitch, M. Absolute humidity and  
753 the seasonal onset of influenza in the continental United States. *PLoS Biol.* **8**, e1000316  
754 (2010).
